# Supplementary material
Source: PubMed Central journal article supplement (PMC5359585)

# Supporting information

## **Synthetic core promoters and as universal parts for fine-tuning expression in different yeast species**

Rui M. C. Portela<sup>1</sup>, Thomas Vogl<sup>2</sup>, Claudia Kniely<sup>2</sup>, Jasmin E. Fischer<sup>2</sup>, Rui Oliveira<sup>1</sup> and Anton Glieder<sup>2</sup>

<sup>1</sup> REQUIMTE/LAQV, Departamento de Química, Faculdade de Ciências e Tecnologia, Universidade Nova de Lisboa, 2829-516 Caparica, Portugal

<sup>2</sup> Institute for Molecular Biotechnology, NAWI Graz University of Technology, Petersgasse 14/2, 8010 Graz, Austria

### **Supplementary Material:**

|                                                                                                           |    |
|-----------------------------------------------------------------------------------------------------------|----|
| S1 – Summary of literature references on <i>S. cerevisiae</i> and <i>P. pastoris</i> core promoters. .... | 2  |
| S2 – Detailed computational design of synthetic core promoters .....                                      | 3  |
| Supplementary Table 1 .....                                                                               | 6  |
| Supplementary Table 2 .....                                                                               | 7  |
| Supplementary Table 3 .....                                                                               | 10 |
| Supplementary Table 4 .....                                                                               | 14 |
| Supplementary Table 5 .....                                                                               | 17 |
| Supplementary Table 6 .....                                                                               | 21 |
| Supplementary Table 7 .....                                                                               | 25 |
| Supplementary Table 8 .....                                                                               | 26 |
| Supplementary Table 9 .....                                                                               | 28 |
| Supplementary Table 10 .....                                                                              | 29 |
| Supplementary Table 11 .....                                                                              | 31 |
| Supplementary Figure 1 .....                                                                              | 32 |
| Supplementary Figure 2 .....                                                                              | 33 |
| Supplementary Figure 3 .....                                                                              | 34 |
| Supplementary Figure 4 .....                                                                              | 35 |
| Supplementary Figure 5 .....                                                                              | 36 |
| Supplementary Figure 6 .....                                                                              | 37 |
| Supplementary Figure 7 .....                                                                              | 39 |

## **S1 – Summary of literature references on *S. cerevisiae* and *P. pastoris* core promoters.**

In this section we will succinctly describe the main studies developed to clarify the mechanisms of yeast promoters, focusing on *S. cerevisiae* and *P. pastoris*. The references of S1 and S2 follow the numbering of the main text.

### ***S. cerevisiae***

Sugihara *et al.* identified CRMs in TATA-less and TFIID-dependent core promoters, namely *RPS5*<sup>32</sup>. Park *et al.* developed a method for improved transcription start site (TSS) mapping, inferring relationships between core promoter *cis*-regulatory elements, chromatin features and TSS location<sup>33</sup>. A study on the effect of 5'UTR features in gene expression was presented by Dvir *et al.*<sup>34</sup>. It has been shown that yeast core promoters show a high level of conservation, maintaining their functionality even in distantly related species<sup>27</sup>. As illustrative example, the *S. cerevisiae* *LEU2* core promoter has been shown to remain functional when inserted in *P. pastoris*<sup>8</sup>.

Different approaches have been followed to design synthetic promoters for protein expression fine-tuning. Some are focused on CRMs<sup>37,38</sup>, while others target both CRMs and core promoters<sup>7,9,18,19,39–42</sup>. For CRMs design, the interaction between transcription factors (TFs) and respective binding sites (TFBSs) have been used to model transcription, either by creating a large library of promoters based on combinatorial arrangement of different TFBS upstream of the natural core promoter<sup>38</sup> or by generating orthogonal synthetic zinc fingers used to wire new synthetic transcriptional cascades<sup>37</sup>. Also, the inclusion of regulatory sequences next to the core promoter can be used to fine-tune transcription. Other design approaches consisted in adding random mutations to a natural promoter (*TEF*)<sup>7,9</sup>, randomizing two specific areas of the *PFY1* promoter and changing its expression profile afterwards by adding Tn10 Tet operator sites<sup>41</sup> or generating a minimal promoter based on a large scale screening of random sequences for minimal length, robustness and modulatory<sup>19</sup> has been used for the same purpose.

### ***P. pastoris***

Promoter libraries have been generated mostly based on deletions of CRMs sections to research the *P<sub>AOX1</sub>* regulatory mechanisms and to determine TFBSs (*e. g.*<sup>24,26</sup>). Promoter libraries have also been created to control gene expression by modifying the core promoter<sup>16,25,43</sup> and 5'UTR<sup>44</sup> sequences. Berg *et al.* studied random mutagenesis of *P<sub>AOX1</sub>*<sup>16</sup>, located in both core promoter and CRM regions. They observed expression profile modifications (derepression) when mutating some specific nucleotides in the *P<sub>AOX1</sub>* CRM, and modifications in the expression rate when mutating the core promoter sequence. Following a different approach, *P. pastoris* synthetic core promoters have also been designed based on four natural *P. pastoris* core promoters consensus sequence through the addition of some natural TFBSs<sup>25</sup>.

## S2 – Detailed computational design of synthetic core promoters

Given that the core promoter design method was based on features from a genome wide list of *S. cerevisiae* natural core promoter sequences<sup>28</sup> it can be divided into three parts:

- a) Computation of features from the *S. cerevisiae* data set to be used for the synthetic core promoter design;
- b) Generation of core promoters sequences based on calculated data;
- c) Design space reduction – selection of core promoter sequences to be tested *in vivo*.

As mentioned in the main text, several features were simultaneously incorporated in the design given that they were found to be correlated with maximal promoter activity<sup>28</sup>. The features included in the design process were: *i*) nucleotide occurrence along the sequence of 140 strong natural *S. cerevisiae* core promoters (as reported by<sup>28</sup>), *ii*) the presence and position of the TATA box, *iii*) the position and number other motifs (other than TATA box, as defined by<sup>28</sup>) and *iv*) nucleosome occupancy profiles<sup>28,45</sup>.

As described below, all the referred information was calculated in the first design part (*a*). However, the nucleotide occurrence, TATA box position and motif position and frequency was included in the core promoter design (*b*), while the nucleosome occupancy profile was included indirectly in the design process as a selection step (*c*).

It should be highlighted that only some of the motifs described by Lubliner *et al.* were added in this design process. The selection criteria were: strong reported correlation with maximal promoter activity and motif position within the desired core promoter region (from start codon to 150 bp upstream of it given that our core promoters' target length was 150 bp). The list of selected motifs and respective location is provided in Supplementary Tables 7-10.

### *a) Computation of features from the S. cerevisiae data set to be used for the core promoter design*

Firstly, from the whole 729 native *S. cerevisiae* promoters' data set we focused on the 140 strong core promoters and respective 5'UTR. The sequences were trimmed to have a final length of 150 bp (corresponding to 50 bp downstream and 100 bp upstream the transcriptional start site (TSS)). From this subset we computed the:

#### **1. Nucleotide probability distribution along the core promoter sequence** – The

frequency of each nucleotide was computed separately for consecutive promoter regions, in a sliding windows manner (windows size of 20 bp and windows step of 10 bp). The probability was calculated for each nucleotide and promoter region (frequency of each nucleotide for each promoter region was divided by the windows size). This resulted in a matrix of  $n \times w$ , with  $n$  the number of nucleotides (4) and  $w$  the number of windows (14). The sum of these probabilities, column wise, was 1;

#### **2. TATA box position distribution along the sequence** – Considering the TATA box consensus sequence (TATAWAWR), all the occurrences location of this motif were annotated. A

Gaussian distribution model was inferred from this set of TATA box locations using the respective average ( $\mu^T$ ) and standard deviation ( $\sigma^T$ );

**3. Position and frequency distribution of motifs along the sequence** – For each of the selected motifs listed on Supplementary Tables 7-10 a similar approach, as compared to the previous step, was used: annotation of number and positions of motif occurrences (respectively,  $f^{Mi}$  and  $p^{Mi}$ , with  $i=1,2,\dots,7$ ). For each set of frequency and positions a Gaussian distribution model was inferred (described by the respective average ( $\mu^{Mi}$  and  $\mu^{pMi}$ ) and standard deviation ( $\sigma^{Mi}$  and  $\sigma^{pMi}$ ));

**4. Average nucleosome occupancy along the promoter sequence** – The last step pre-design computation was the natural nucleosome occupancy average profile. For this step a software package by <sup>45</sup> was used. With it, for each 140 natural core promoters a nucleosome profile were calculated. To avoid sequence edge related error, a 1000bp sequence (derived from the original cloning plasmid) was added to each side of the promoter sequences. The average nucleosome profile ( $\mu^N$ ) was calculated using the obtained 140 occupancy profiles (each profile consisted of 150 occupancy scores related with each nucleotide,  $j=1, 2, \dots, 150$ ).

*b) Generation of core promoters sequences based on calculated data*

As mentioned in the main text, 4 different groups (named P, T, M, A) were designed using the previously calculated information. They differ in the presence or absence of a TATA box and/or selected motifs (group P: without TATA box nor motifs; group T: with TATA box and without motifs; group M: with motifs and without TATA box; group A: with TATA box and motifs).

The sequence generation was computed as follows:

**1. Random sequence generation** – 400 sequences, of 150 bp each, were generated with the MATLAB function *randseq*. This function had as input the vector of nucleotide probability  $w$  ( $i=1, 2, \dots, 14$ ) and the sequence length (equal to the window size – 20). Thus, the *randseq* function was used 14 times to generate each sequence;

**2. Removal of randomly occurring motifs (TATA box and selected motifs)** – TATA boxes and any of the selected motifs were searched and replaced by a newly generated sequence. This procedure was repeated until no motif or TATA-box were found in the generated sequences;

**3. Removal of randomly occurring start codons** – Following the previous step approach Start codons upstream of the protein codon region were also removed to avoid frame shift mutations or different N-termini of the reporter protein;

**4. Add Kozak sequence upstream of start codon** – Due to the known relevance of the nucleotides adjacent to the start codon <sup>34</sup>, this region was replaced by the  $P_{AOX1}$  Kozak sequence (CGAAACG) in the generated sequences;

**5. Separation of sequences in 4 groups** – The 400 sequences were divided in 4 groups of 100 sequences each. The group P had no further modifications as it is characterized by not having TATA box or any other motifs;

**6. Addition of a TATA box to groups T and A** – For each sequence belonging to these groups, a TATA box position was generated (*randn* MATLAB function). The TATA box Gaussian

distribution was taken into account by multiplying the generated number with  $\sigma^T$  and summing  $\mu^T$ . One TATA box was inserted per core promoter sequence. The sequence originally located in this region was replaced by the TATA box. The sequences in group T had no further modifications as this group is characterized by having a TATA box and not having any other motifs;

**7. Addition of motifs to groups M and A** – In a similar way as in the previous step, the number of motifs and respective position was generated with the *randn* MATLAB function together with the respective average ( $\mu^{fMi}$  and  $\mu^{pMi}$ ) and standard deviation ( $\sigma^{fMi}$  and  $\sigma^{pMi}$ ). Thus, the frequency of each motif in each sequence also followed a Gaussian distribution model inferred from the natural sequences, meaning that some motifs might be present more than once while others might be absent in a given sequence.

*c) Design space reduction – selection of core promoter sequences to be tested in vivo*

From the 100 sequences in each group, 28 were selected for experimental screening. For each of the 100 designed sequences a nucleosome occupancy profile was calculated (as described in a-4). Using the calculated profiles, the objective function that was used to select the 28 sequences was:

$$\min \left( \sum_{j=1}^{150} (\mu^{Nj} - \mu^{sj})^2 \right) \quad \text{Eq. 1}$$

Where  $\mu^{Nj}$  is the average nucleosome occupancy profile for natural core promoter sequences,  $\mu^{sj}$  is the nucleosome occupancy profile for each  $s$  ( $s=1, 2, \dots, 100$ ) synthetic core promoter sequence along its  $j$  nucleotide position ( $j$ ). The 28 sequences with a lower sum of squared errors were selected. With it we aimed to select for screening the designed sequences that were more similar to the natural promoters concerning the predicted nucleosome average occupancy.

**Supplementary Table 1** – List of primers used to clone the positive and negative controls

| Name                                                            | Sequence                                                                                                                                                                                                            |
|-----------------------------------------------------------------|---------------------------------------------------------------------------------------------------------------------------------------------------------------------------------------------------------------------|
| <b>C-WO-CRM1</b>                                                | TATTGTGAAATAGACGCAGATCGGGAACACTGAAAAATACACAGTTATTATTCATTTAAATGACAGCAATATATAAACAGAAGGAAGCTG<br>CCCTGTCTTA                                                                                                            |
| <b>eGFP-pAOX1-3prime<br/>pAOX1_Syn_dBamHI_Swal-<br/>forward</b> | AAAAGTTCTTCTCCTTTGCTAGCCATCGTTTCGAATAATTAGTTGTTTTTGGATCTTCTC<br>GATCGGGAACACTGAAAAATACACAGTTATTATTCATTTAAATAGATCTAACATCCAAAGACGAAAGGTTGAATGAAAC                                                                     |
| <b>C-WO-Core1</b>                                               | GTTCTTCTCCTTTGCTAGCCATAAGTAGGGGTTAGAACAGTTAAATTTTGGATCATG                                                                                                                                                           |
| <b>C-W-HHF2+10</b>                                              | GTTCTTCTCCTTTGCTAGCCATATTTATTGATTATTTGTTTATGGGTGAGTCTAGAAAAGGACGCACTCGTCTTGTATTTATAGATGAAAA<br>GAAAGTAGGGGTTAGAACAGTTAAATTTTGGATC                                                                                   |
| <b>R1</b>                                                       | GTTCTTCTCCTTTGCTAGCCATCGTTTCGGAGTCTGGGGCGGTCTTATGCTAATCGTTGGTGCCTGTCTAGAGAGTTGCGAACAGGC<br>AAGGCGCCGGAGATAGAGTATCGTGAAGGAATTTATAGAGGGTCTATCGCCGCAGTCGTCGACGGGCAAACAAGCACCGGGCAAGTA<br>GGGGTTAGAACAGTTAAATTTTG       |
| <b>R2</b>                                                       | GTTCTTCTCCTTTGCTAGCCATCGTTTCGAACACGTATGGGCCAAGTGTGTTGAAATTC AACCTAGTTTTGAGGGTTACGATACGGACCTC<br>CCCTACGCTGCAGTCCTATCAGCGAGGCGCAGCAAGCGTTAGGCGTGC GGCTTCCAGACTCAAGGAGACCTTGGCGATATGAAGTAG<br>GGGTTAGAACAGTTAAATTTTG  |
| <b>R3</b>                                                       | GTTCTTCTCCTTTGCTAGCCATCGTTTCGACGCTTTTCAAGAGGATGGCTACTCCCGGCTAGTAAGTTGGCTTGTGTTGCTTGACGGATG<br>ACTTAGGGTTTTTAATGAAGGCCGTTGTGTCTACGGACACGACACGGGTGTTCTACTCGCGCCTCTTGGGAGCACTTTAATAAAGTAGG<br>GGTTAGAACAGTTAAATTTTG    |
| <b>R4</b>                                                       | GTTCTTCTCCTTTGCTAGCCATCGTTTCGACGTTAGAGATTGGCTTCTTAAGATCGAGTAGTGATTCCGTATATAGGCTCGCTTACCCAG<br>ATCCCCTAGACTGTTTCGCTTTGCTATGAGTCTCAACTAACCCCTAAATGTCCGTGCCCGTTTTCTATCGTATATTAGGGGACAAGTAGGGG<br>TTAGAACAGTTAAATTTTG   |
| <b>R5</b>                                                       | GTTCTTCTCCTTTGCTAGCCATCGTTTCGAAATGTAGCTTTGTCCGTAGAATACCCGGTATAAGACAAGAGCAGTCTAGTAGGAGAGCTC<br>CTTTGACCTGCCGTTTCTGGGAAGGGCCAGGAAACGGGTTACGGTTCACGACACGAATGCGTGTTTCGTGACTGTTAAGTAGG<br>GGTTAGAACAGTTAAATTTTG          |
| <b>R6</b>                                                       | GTTCTTCTCCTTTGCTAGCCATCGTTTCGATCAACCGGCAATTCAGAAATGCGGGATTTAGTACACCTATTTCTTTACCAACTCCCGCCG<br>CGTTTTAGCTTAATGATGAGCGGTGGGCGTGTGTTTTGAAAAAAGATGTTAGAGATATATTCTAGTCAGAGGGTTTCGACTAGAAAAGTAGGG<br>GTTAGAACAGTTAAATTTTG |
| <b>R7</b>                                                       | GTTCTTCTCCTTTGCTAGCCATCGTTTCGTGCTTACCGGTGGATTACGTACGGGTTGGATGAGAAGTGGGATGGCCCAACACCAATTG<br>ATTGTCAACTCCGACCTGAAGGCTTCACAAGAGTGGAGGGTACAGCTAGTACTGAGTGTGTTAATTGGAGTACGGTCCGGCTTAAGTAGG<br>GGTTAGAACAGTTAAATTTTG     |

**Supplementary Table 2** – List of primers used to clone the synthetic promoters of group P

| Name | Sequence                                                                                                                                                                                                             |
|------|----------------------------------------------------------------------------------------------------------------------------------------------------------------------------------------------------------------------|
| P1   | GTTCTTCTCCTTTGCTAGCCATCGTTTCGCGAGCACTTCTAGTTTTCGAAGATACAGTTCCACAATAGGTTCTTTCTATCGTCAGTATTCTCGTTC<br>GCAAGCAAATAATTTCTGGGATTATAGCGGAGTTTACAACTAAACAAGATGTGCCTACTAGGCTATTCTAGACTAAAAGTAGGGGTTAGAACAG<br>TTAAATTTTG     |
| P2   | GTTCTTCTCCTTTGCTAGCCATCGTTTCGTCGTGAAATTAAGGGTTAACTGCACTCGCGTATTTAGAAAGACTACTCTCGTAGGTTAATGC<br>AACTCTACAAGTGATGACTTTGCTATGAACTACTTGTACTACTTACAATCTGTCTAGCAAAGTCCGAAGTCCTAAGTAGGGGTTAGAACAG<br>TTAAATTTTG             |
| P3   | GTTCTTCTCCTTTGCTAGCCATCGTTTCGATAATTTCAACCCTTCGTTCCGAAAAGTGAACGTGAGTTTCTGTTTGGCTATTCCGCGTATATCG<br>TTTCTGAATTATTGAATAGAGCACAAATATCAAATACTAAAAATCGAGTTATTGGGATCGTACCAATACGTGGTTTAAAGTAGGGGTTAGAACAG<br>TTAAATTTTG      |
| P4   | GTTCTTCTCCTTTGCTAGCCATCGTTTCGGTTTTGCTTTAATCTGTTAGGCAATATCCCTATTACGCAAACAGAGACTAACACCAACGACCAAG<br>ACTTATATTTTGTGCGCACTACTAGCTAGGAACGTAGATATCAGTTACAAATATAATTCCTACTACGAGTTATCCGGAAGTAGGGGTTAGAACAG<br>TTAAATTTTG      |
| P5   | GTTCTTCTCCTTTGCTAGCCATCGTTTCGAAGACTCAGTTACGACGTAGAGAGGATGGATAGGCCGTTTCGTC AACAGAGCGATCTAATTGTTTC<br>GTTACTGATGGAATTGTTGGATAGTGTAAATCTAATAATGGAATTATATTTCAATTACTTGTGTTGGGTAAAACGCCTGAAGTAGGGGTTAGAACAG<br>GTTAAATTTTG |
| P6   | GTTCTTCTCCTTTGCTAGCCATCGTTTCGCTAGAACTAGGTTCTTCTCCTACTGTCTAAATATCTCTATATTTTAAAGTGAAATTTGGAGTGGTCG<br>TTATAACTACTCGTTTTAGTGCACCCTAGTCGGGGGTCTAAAATTACAGTATACAAGTAAAGTTGTGATGACTCCAAAGTAGGGGTTAGAACAGT<br>TAAATTTTG     |
| P7   | GTTCTTCTCCTTTGCTAGCCATCGTTTCGCTAAACTGTTTCTATCTTCTTATGTTTAGTAATGTAGCGTGAAATAATGTCAGACGATTATCTACTA<br>CGAGACTACACTACGATACGTAACGAGGAGTGACTTGGGGGTACCGTATAGTTGTAATCTACCTACTTCCGCCAAGTAGGGGTTAGAACAG<br>GTTAAATTTTG       |
| P8   | GTTCTTCTCCTTTGCTAGCCATCGTTTCGATATGATCGTATGGGCAAACCTCACTCTGTTTCTAATTATAATTTAGCTTCGGATCGTATGAGGGT<br>GGACACCTCGGTTGACTTGACTACGGTTCTAATGAACTTTTAAATAATCGTACCCACCTAATTAGAGAAGTATATAGAAGTAGGGGTTAGAACAG<br>GTTAAATTTTG    |

**Supplementary Table 2 (cont.)** – List of primers used to clone the synthetic promoters of group P

| Name | Sequence                                                                                                                                                                                                               |
|------|------------------------------------------------------------------------------------------------------------------------------------------------------------------------------------------------------------------------|
| P9   | GTTCTTCTCCTTTGCTAGCCATCGTTTCGGATTCTAATGATATCTTCCACGACTGTAGAGCAACGGTTAGCAAACACTACTATGTAGATGTTTTAGA<br>TTGTGATTTAGATGCAAACACTATGTTCCCTTATTTTAACAACAATAGTGCAACTATATTGGAACCTACCTGCAGAAAGCAAAGTAGGGGTTAGAACAG<br>TTAAATTTTG |
| P10  | GTTCTTCTCCTTTGCTAGCCATCGTTTCGAAAGAACACGACGTCTATGAACTAAGGTTTCAGTCTAAATACTAAATAAATGAACTTGTATCTATTTT<br>TTTGCCTGATATAAGTTGCGTTGGGAAGACTAATTATGAAGATGTTCAAGATAAGATGAATTGAATAACTAAAAAAAGTAGGGGTTAGAACAGT<br>TAAATTTTG       |
| P11  | GTTCTTCTCCTTTGCTAGCCATCGTTTCGTTCTGTACTTAACAGTAGCACTACAATTTCTTAAGTACTAATTTACTTTTATTCCTACTACTAAGTGG<br>TTTTCAGCTATGGTGGTTCAAATATTAGGTAGCCTAGTATCCCACGTACGTAATGAGACAAAACTAATAATGCAAAGTAGGGGTTAGAACAGTT<br>AAATTTTG        |
| P12  | GTTCTTCTCCTTTGCTAGCCATCGTTTCGAGTTTTATTAAGAATTTAGCTCTAGCTACAATCGATTTATGCAATCGTGCTAGACTGGAATAACTT<br>GTAGCTACGCGTATGGCTTCGTATTGGGAGAAGTAGTTAACACACGACTATGGATATTATGGTAAATAGTCAATAAAGTAGGGGTTAGAACAG<br>TTAAATTTTG         |
| P13  | GTTCTTCTCCTTTGCTAGCCATCGTTTCGTTAATCACGGGTGAAAATTAAGAGAACTTTTAACTTAATGAGACTAGGGGAATAAACTTTGAATTG<br>GTTCTCGTACGTATGCGGTAACCTCGTGATTTTGCCCTATGAGTAATAGGTAGAATCAAGAATGTACTACTAATATGGAAGTAGGGGTTAGAACAG<br>GTTAAATTTTG     |
| P14  | GTTCTTCTCCTTTGCTAGCCATCGTTTCGTATAACTTTAATTTCTTTCAATTTTAAAAAATATAAAACGGTAACTAAAGGTATTTTTTCGCGTTAACC<br>AATAACTGATTTTAAGTATATCTGCAGAGTAAGGGTTGATGAAGCAGGTAGCTATTTGAGTAGAATCGTACAATGAAGTAGGGGTTAGAACAGT<br>TAAATTTTG      |
| P15  | GTTCTTCTCCTTTGCTAGCCATCGTTTCGGTATTATCTATAACCACTATACTTTTCTATTACTAATTTTCAAGCAATACGTTTCGTGTTTGCCTAAGT<br>ATACCCTGGTATCTGTGACTCAAGCTAAGTAACGAGATTATTGACCTACCTTTGGGTGTATCAAGTCTAACAAAGAAGTAGGGGTTAGAACAGT<br>TAAATTTTG      |
| P16  | GTTCTTCTCCTTTGCTAGCCATCGTTTCGGTATTAAGAATAAAGTTCTCAGAAGGGTTTAAATGCGAGCTTAATTTGGGATGCTTAGATGTTATC<br>CTTATCTAAATTCACATAACACAGATAGTTCAGTTAATGAGCAGAATTTTGTGACAGAATCTGTGATGTGTCAAAGTAGGGGTTAGAACAG<br>TTAAATTTTG           |



**Supplementary Table 2 (cont.)** – List of primers used to clone the synthetic promoters of group P

| Name | Sequence                                                                                                                                                                                                         |
|------|------------------------------------------------------------------------------------------------------------------------------------------------------------------------------------------------------------------|
| P17  | GTTCTTCTCCTTTGCTAGCCATCGTTTCGAACACTCTCTAATGATACGCGAGCTAATTAGAAGAGAAGCTAGCTTATGAAGTTTATCGGTTGCTC<br>CCACTATCAAACATAAATAAGTGGAAAAAATTCTCGTGTCGTTGTTGAACAACATAAGTCCTATTATCGTGTCCAAAGTAGGGGTTAGAACAG<br>TAAATTTTG    |
| P18  | GTTCTTCTCCTTTGCTAGCCATCGTTTCGAATAGATACAAAATCGTTAACTATAGGTAGTGCTAGTACTTTTCAGATACCTTTTTGGTAGGCTAATT<br>TATCTATCAATATATTAAGTACGGTCTCCCTCGTTGAATGATAACTCAGTACCTAACTAACACTTTAATTAAGGAAAGTAGGGGTTAGAACAGTT<br>AAATTTTG |
| P19  | GTTCTTCTCCTTTGCTAGCCATCGTTTCGAAGCTCGGTAATTCTAGAGTTTTAATTCGTTCTGTTAATTACAATGAAATCTACGTTCTAAATTTTT<br>CAATAAGTTTCTAATCAATCACGGGCAATTACAAGGATTGAAGTAGTCTACCTTTGTGTTCTAGTGTGGACAGTCAAGTAGGGGTTAGAACAGTT<br>AAATTTTG  |
| P20  | GTTCTTCTCCTTTGCTAGCCATCGTTTCGAAATCGACTTCTATTAATAAAGTCTAAGACTACGTTATTCAGATGCTACCTTTGAGAGTTTATA<br>TCTACTACTATAACTGTAGTCACACGAACCTAGAATTCAGTTTCCACGGTTTATAATTACTCTATCTAAAGGGATTAAGTAGGGGTTAGAACAGT<br>TAAATTTTG    |
| P21  | GTTCTTCTCCTTTGCTAGCCATCGTTTCGTTCAAGGGTCACCTACAATAAGTTCTTTAGAGTATGTATATTAAGTCTATGTTGCAAGATATGGGT<br>AACTATCAGATCGGTAAATCGTCGGTTCTAATACTATGAACTAAAAAGGTCTAACCTATGATCCTATATTCTCCTAAAGTAGGGGTTAGAACAGT<br>TAAATTTTG  |
| P22  | GTTCTTCTCCTTTGCTAGCCATCGTTTCGCTTAATCTCGATAATATACTTTAATTACTAAAGGAGAACGATTCACAAAATAAGCAACTACGATATT<br>GTCAACTATGCAAATTTTGATGGGTAGAGTAGTCTAGATTGTTATATTCAACTGCGAAAAAGATAGCGGAAACTTGAAGTAGGGGTTAGAACAG<br>TAAATTTTG  |
| P23  | GTTCTTCTCCTTTGCTAGCCATCGTTTCGTCAGTTCTTCTAGAGGTATCTGGTTTTCTAGATTATTCGTTTTTTATTCTACGGAATTTGGAATTTG<br>GTGTTTGAAGGTGTTACCTCTGCGACAGATTTTGTTATTCTAAAATAGTACCTCCCGAGTGAGCAAACAATTGACGAAGTAGGGGTTAGAACAG<br>TAAATTTTG  |
| P24  | GTTCTTCTCCTTTGCTAGCCATCGTTTCGTCAAAATTCAACTAATTACAATTAAGATATTAATAAATCTTTAGCGCTATGGGGTGAGCTAGTTAA<br>TGGCAAGACAAGATAGCTAAATTTAAGTTCCGTATATGTCTACTAGTGTTCGTGGACTCAAATTAAGAAAGATGAAAGTAGGGGTTAGAACAGT<br>TAAATTTTG   |

**Supplementary Table 2 (cont.)** – List of primers used to clone the synthetic promoters of group P

| Name | Sequence                                                                                                                                                                                                         |
|------|------------------------------------------------------------------------------------------------------------------------------------------------------------------------------------------------------------------|
| P25  | GTTCTTCTCCTTTGCTAGCCATCGTTTCGAATTAATTATTTACTTCTAGTCAGCACTAATGAGGTTTCAGCTTTTATTGAACTTCTGTCAGATTAGT<br>ATACTAGCTACAACATAAATCTGCGAAGCTAAGTTTAGGAAATAATATCTGTATTTATGCTCCCGATTTCAGTCAAGTAGGGGTTAGAACAGTT<br>AAATTTTG  |
| P26  | GTTCTTCTCCTTTGCTAGCCATCGTTTCGTGATTTATGCGTTATGGATATGTTAAGGCAACGATAATTATTAAGGAATAGTCGTTAGAGCCGTG<br>TGAATTCTACTACGTATTATTCTAAAGAGTCACTACTGATGTCCTTATCTATTAGTGATATATTTTCGACCAGACGAAAAGTAGGGGTTAGAACAGT<br>TAAATTTTG |
| P27  | GTTCTTCTCCTTTGCTAGCCATCGTTTCGGTCTAGCTAAACCTTCTACAATGTGAATTATTCAAACGTAGATCGTAGGATTCTAAGGTTTCGTGGA<br>CAGTAGTTGTTTATAGGGGGCTCTAGAGAGTTTGATTAGCGATATTTAGAGACCAAATTTACCTGATAGCCTAGCAAGTAGGGGTTAGAACA<br>GTTAAATTTTG  |
| P28  | GTTCTTCTCCTTTGCTAGCCATCGTTTCGACTAAGTTCACACGGGCTAATATTTAAGATAAACTATAGGATGCTAATATTTACGTATAATGGAAG<br>GTCCTGTAATATCCTCCAGATGGATTTGTTAACTATTTTATACTGATCGTAAAGTGATTAATGTTGAATCCCCTAGCAAGTAGGGGTTAGAACAG<br>TTAAATTTTG |

**Supplementary Table 3** – List of primers used to clone the synthetic promoters of group M

| Name | Sequence                                                                                                                                                                                                          |
|------|-------------------------------------------------------------------------------------------------------------------------------------------------------------------------------------------------------------------|
| M1   | GTTCTTCTCCTTTGCTAGCCATCGTTTCGATCTAATATTCAGAACTATATCGTTTAGCGGGATGGGCAAGTGCCGCCCTATTTTTAAAATGAAT<br>AACTACTAGATTTACACACGGGTTTGTGTTGATATGTTATTACAATCTAGCTCAATGATTATACTTGATCTCTTTAAGTAGGGGTTAGAACAGT<br>TAAATTTTG     |
| M2   | GTTCTTCTCCTTTGCTAGCCATCGTTTCGGTAATATTCAAGGTGGGTTGATGCACCCTAAGGTGGCTATTCTTTTTGCCTGGTGTGTTACTGCTAT<br>TTCTGTGGCACTTTAGAACAGTTCCTTCGACAGTCTGTTTTCCGCTAAGGAGAGTAATGGACGGATTACCGAAGCGAAGTAGGGGTTAGAACA<br>GTTAAATTTTG  |
| M3   | GTTCTTCTCCTTTGCTAGCCATCGTTTCGGACTCACTTGGAGCTTGTTAAGTAATCAGGGCGTTCGGTTGTTGAAAGTTTGATTGGTTACGGTTCT<br>TTCGATTTTCGGCCTTTAGTCTACTACTAGTCTCCTTTAACCGCTAGTCTGCACTAGTACACCCAATCTCTAATTCGAAGTAGGGGTTAGAACAG<br>TTAAATTTTG |

**Supplementary Table 3 (cont.)** – List of primers used to clone the synthetic promoters of group M

| Name       | Sequence                                                                                                                                                                                                           |
|------------|--------------------------------------------------------------------------------------------------------------------------------------------------------------------------------------------------------------------|
| <b>M4</b>  | GTTCTTCTCCTTTGCTAGCCATCGTTTCGTTTGTCTATAAAGAGATTTTCGAGGACACTACGCTAGCAGATTGTGAGATTAATCGTTTTGAGCAAG<br>TTATCAAAGAAATTTCACTGCTGGGCTTTTCTTGGCCACTCTCACTATCTTTACTGATCTCGTACTACTAGGTAAACAAGTAGGGGTTAGAACAG<br>TAAATTTTG   |
| <b>M5</b>  | GTTCTTCTCCTTTGCTAGCCATCGTTTCGTTTGTATTGTGGTCCTTATACAGGACGTTGTATCACCTGAGGTTCTTTTTCTAGCTACACCAAAGAT<br>TATTAATACCTAAACTTAGTGAGATAAGTTATGATGTTATAACTAGTTATGTCAAGACGGGCTAACTCCAATAGACAAAGTAGGGGTTAGAACAG<br>TAAATTTTG   |
| <b>M6</b>  | GTTCTTCTCCTTTGCTAGCCATCGTTTCGCTATTAACAATGCGCGTAGATGATTAGATGCTTAACCTTATACTAAGAGTTGATGACGCGGCCGTT<br>GCTTTTTCAAGATCTTAAGTTTTTTCAGATCTTTGCTTCAAATCGCTAACTATTAATAATACGCCCTAGAAAAATCGTAAGTAGGGGTTAGAACAGT<br>TAAATTTTG  |
| <b>M7</b>  | GTTCTTCTCCTTTGCTAGCCATCGTTTCGTTTGTAGTTTCGATATGGGTAAAAGGGCTATATGAGAGGGTACTCAGTGTCTGGAATAATTTTTGTTGG<br>TAAGTTCGAATCTATAGTGTTAAGCTAGGCTGTTCTATTGCTAATAGTCCGTCTTTGCGTCTTCAACGATTTTGGTCAAGTAGGGGTTAGAACAG<br>TAAATTTTG |
| <b>M8</b>  | GTTCTTCTCCTTTGCTAGCCATCGTTTCGCGTTAGGGTCTATTTTTATGAGGACAACAGCGCTCTAGTATACCTTTTCGTAGGGCCGGAAACTAT<br>CTAAGTGCCGCTATCGACTAGAAGCTTATTATCCCCAAGATCAAATATATTGTTGAAAAGGATTATCTCAACGGCTGCAAGTAGGGGTTAGAAC<br>AGTTAAATTTTG  |
| <b>M9</b>  | GTTCTTCTCCTTTGCTAGCCATCGTTTCGTTTAACTTAACAAAATACGTAGATGATTCCTCTTTTAACTAAAGGAATGACTATTAACTCGATAGCTC<br>CTAGAGAACGTACCAGATTTTGGTGGTTTTCTTTTTTGTCTACTTTCTGATTACTACTATAACAAGAAGTTTAAGAAGTAGGGGTTAGAACAGTT<br>AAATTTTG   |
| <b>M10</b> | GTTCTTCTCCTTTGCTAGCCATCGTTTCGAGTAAAATTATCTTCTTCAGTTGGCAAGGTCCTCCACACGGATACTTTATCCTAATAGAGTTGCG<br>ACAACTACTATGAACTATCCTTAGGTAAAAGCGGCCCCAAAATAAACTGTACCTTGTACAACCTACTAAAGTACGTAAGTAGGGGTTAGAACAG<br>TAAATTTTG      |
| <b>M11</b> | GTTCTTCTCCTTTGCTAGCCATCGTTTCGGACTGAGGTCCTTCGTATTTAGGTGTATGCTAATGTAACCTCTATCCTATTCGAGTCACAGTGGCT<br>CCCAAGTAAATGTCCACACTTAATGAACGCTACTCAATTATAACCACTATGTTAGCCTTAAAATGGCTACTCAAATAAAGTAGGGGTTAGAACAG<br>TAAATTTTG    |

**Supplementary Table 3 (cont.)** – List of primers used to clone the synthetic promoters of group M

| Name       | Sequence                                                                                                                                                                                                         |
|------------|------------------------------------------------------------------------------------------------------------------------------------------------------------------------------------------------------------------|
| <b>M12</b> | GTTCTTCTCCTTTGCTAGCCATCGTTTCGAACTGGGGTCACTCAAAATTGAGACCCTAGACTTTAAGTATCCTACAGCTAGTACCTGCACCGCT<br>ACCTCAAACTTTGAACGTTGAAATCGATTGCAACGAACTTGTAACGATCCTGTTAGGAAGCTAAGTGTATAGTGAATAAGTAGGGGTTAGAAC<br>AGTTAAATTTTG  |
| <b>M13</b> | GTTCTTCTCCTTTGCTAGCCATCGTTTCGCCGATCAAAGATTTTTCTAGATAGTTATTCACTACGGTTTTATTCTATACGAACTAAGCTTCACGGT<br>AGTGTACTATTGCTATGTGGCTACTTTGACTCCGCTGGATTCTATCGCTTTTAGCAATATATAATGAAGTTATTTAAGTAGGGGTTAGAACAGT<br>TAAATTTTG  |
| <b>M14</b> | GTTCTTCTCCTTTGCTAGCCATCGTTTCGGGAACCGAGCTCTATTGTGAATACTGCTGCCGGTACGCTCGGTCTGATTAGAATCTCTATAGATA<br>TGGAGCCGACTCGCGTGTGGACGATGTATATCTATTTGAACCCCAAAATTTAATCGCTACAATCCTCGAAAAAATAAGTAGGGGTTAGAAC<br>AGTTAAATTTTG    |
| <b>M15</b> | GTTCTTCTCCTTTGCTAGCCATCGTTTCGAATTTCAATACTTGAAATAGTGAGACTTATCTAACTATTAGTAAGTATGGAAGAGAACTGAAGAAAG<br>AGACTATTATAAGAATTC AATACCTCTTATTTTTGAAAGCTAGATCTGAGTTACTGGACTTTCTCGACACTACAGAAGTAGGGGTTAGAACAGT<br>TAAATTTTG |
| <b>M16</b> | GTTCTTCTCCTTTGCTAGCCATCGTTTCGAATAACCTGTGATATTACACTCTTATGATCTTTCTATCAGGTTCTTATGCTTCTGGCTATTCTGA<br>TAATTCCTAGTCTGCTCACAAAACAGATTCTATCTTTCCGTA CTATCTTCTTGTAAAGAAATCCCTGTCTAGAGAAAGTAGGGGTTAGAACAGT<br>TAAATTTTG   |
| <b>M17</b> | GTTCTTCTCCTTTGCTAGCCATCGTTTCGTCCTGTTTTGGTTGCGAGATTACCCCTTTCTAAGTTTTCTCTACGTTATGGGGCTCCAAGTAGCTA<br>ATCGGTTGTTGTA ACTGGTCTGTTCCGGCGTTAGTGAGATACCAGGTGATTTGGGTTATTGTACGAACAAATATTAAGTAGGGGTTAGAACA<br>GTTAAATTTTG  |
| <b>M18</b> | GTTCTTCTCCTTTGCTAGCCATCGTTTCGATAAGGTTGACTTTGGACTCGCGTATTCTTGCTATCGAAGTTTGATAGAGTGATCGTCTCTATCTA<br>TTTTTGGGAGTACTGTGCAACTGAGTATTGCAAAATAACTTGATTGTTTATGAGATATGCTAGGTGTATGAAACCCTAAGTAGGGGTTAGAACAG<br>TTAAATTTTG |
| <b>M19</b> | GTTCTTCTCCTTTGCTAGCCATCGTTTCGATAAAATTTTGCCGGGCTGTACGTCTTATCTAGATGTCGTTAAACCTCAGGCCAAGCTCTATATA<br>CTGCAACAAACCGCTAGCAAAGAAATTTAATACTACTACTCTTAAAAATGTATAGAGTTATTTTACTCAATTA ACTAAGTAGGGGTTAGAACAGT<br>TAAATTTTG  |

**Supplementary Table 3 (cont.)** – List of primers used to clone the synthetic promoters of group M

| Name       | Sequence                                                                                                                                                                                                           |
|------------|--------------------------------------------------------------------------------------------------------------------------------------------------------------------------------------------------------------------|
| <b>M20</b> | GTTCTTCTCCTTTGCTAGCCATCGTTTCGATTGTATCTACTTTTTCCCACTATTCAGCGTAAACAGACTAATGCTCCTATCTCTAGAGCTTGGTAGA<br>TTAGTACGTGAAGGTATTA AAAATCTTTTTGTTTCCAATTGAAGGAGAGTTTACCTAACCTTACTGTAAGAGTGTCAAGTAGGGGTTAGAACAGT<br>TAAATTTTG |
| <b>M21</b> | GTTCTTCTCCTTTGCTAGCCATCGTTTCGCAAGGCAACTCGAGTATAAGTCTATTTGTATGCCGTTGATTCAAGAGAGTTCTGTGCCGTTAAAAA<br>TTAGAATGTAATTAGAAGTAGCAATTCAGATACGATTGAATGGCCAATATCTGAAATTTAAGGTAGGGACTAACAACAAGTAGGGGTTAGAACA<br>GTTAAATTTTG   |
| <b>M22</b> | GTTCTTCTCCTTTGCTAGCCATCGTTTCGTTACTTTCTTAATCTAACAAGGATTCTATTCTTTGCGCCTAAAGGTTTAGGAAGTTTTCTGTTTGC<br>CGCGTAGTTGATTTACAAGAACAGTGAAGTATGGCTCGATCTACTAAAATTGAAAGCTAAACGTGGGATAGGTAAGTAGGGGTTAGAACAG<br>TAAATTTTG        |
| <b>M23</b> | GTTCTTCTCCTTTGCTAGCCATCGTTTCGAAAAGTCAATATATTGGAAAATTGCTCAATTAATTGATGTACCCTGTAAGTGGTAAACTTTGTAAA<br>CGTAGTTCACTCAGAATATATCGAGCCACGACTTTAGAAAATCCTTATCTACTTACGAACTTAGAGTTCTCGAATAAGTAGGGGTTAGAACAGT<br>TAAATTTTG     |
| <b>M24</b> | GTTCTTCTCCTTTGCTAGCCATCGTTTCGTGCCTTTTTTTTGAGACTGTTATTTAGTGATACTAGTGTTAGGTATAATCGTGATTCTTAGATTG<br>TTATTTAGATATTTCTATAGACGGCTAACTTTTTACCAACTTAACTTACAGTATATACGCTCTCTATAATTGGCTAAGTAGGGGTTAGAACAGTT<br>AAATTTTG      |
| <b>M25</b> | GTTCTTCTCCTTTGCTAGCCATCGTTTCGATCTAGTAATTTATAAACTACCTTGAGTGAGTGATCGATATTGTGATTCTGATCACGATGATCTCA<br>CCTCGATATTGGATAGATGACTCCTTAAGTGCCAAGAACCTAACTAACTTGATTGGTTAATTATTACGGGTGATAAAGTAGGGGTTAGAACAGT<br>TAAATTTTG     |
| <b>M26</b> | GTTCTTCTCCTTTGCTAGCCATCGTTTCGAATATGTGTCCCTATAAGTGGTCCTACTCACGAAGGATGAATCAAATGAGTATGGATTCAAGGAAG<br>GTA ACTATGGATCTACTTGTGTGAAGGA ACTATTTATCTTTTATGTGAGATAGGTGCCTCTAGTCAAATATTAACCTAAGTAGGGGTTAGAACAG<br>TAAATTTTG  |
| <b>M27</b> | GTTCTTCTCCTTTGCTAGCCATCGTTTCGACTAAAGACCTTTATAAGGGACTGCGTGGTAAATAATGCTATTA AACTCTTTTTGATATTAGGTAT<br>AGTACCTTATCGCTCAACAGTTTTACTACTTCTGCCGCTCTGATTACTGATCGACAATATTATAGTATTATAAATAAGTAGGGGTTAGAACAGTT<br>AAATTTTG    |
| <b>M28</b> | GTTCTTCTCCTTTGCTAGCCATCGTTTCGTATAAATAATGTAATAACTTTAAGATATGGATTGCACTTGTA ACTTAAGCAATTGAAGTTTGCTAAC<br>TAGTTATGTATCTTTTTCTACCTTGGCCGTCCTATTAATATCTACAAGAGAGATCACAATTGACCGAAAGATTACAAGTAGGGGTTAGAACAGT<br>TAAATTTTG   |

**Supplementary Table 4** – List of primers used to clone the synthetic promoters of group T

| Name | Sequence                                                                                                                                                                                                           |
|------|--------------------------------------------------------------------------------------------------------------------------------------------------------------------------------------------------------------------|
| T1   | GTTCTTCTCCTTTGCTAGCCATCGTTTCGCCTATATACGTAGCTACGAGTTAATGACTACAAATATCGCTCTACTCGTAGATGGAGGATAAGGAA<br>CACAAAGGAGCTCGGTTCTATACAAATTCGTTTAGTATTGATTTTATTTATATCAATGTCGTAACGTCGTGTGAAATAAGTAGGGGTTAGAACAG<br>TAAATTTTG    |
| T2   | GTTCTTCTCCTTTGCTAGCCATCGTTTCGATTACTAATCGAAATTACGTCACGTAGTAAGTCAATGTATTAATTACAGAGTATCCTTAATTATAAG<br>ATTGCGTCAGCGAATCGTGTATCTATTCCTATTTACTGTGGATAACGTGAAC TTATATATATCTGGTTAAAGCGCCAAGTAGGGGTTAGAACAGT<br>TAAATTTTG  |
| T3   | GTTCTTCTCCTTTGCTAGCCATCGTTTCGACTATACGATCCACTTCTACTTTCTAGGTATGAAGATGTATGTTAGATCTCGTTTTGTTAGTCGTTA<br>GCCGTGCAATACGTTACTTGACCCTGATACTTATATAGACTATTATACTTTTACTTGTGGTGGTTTCTATCAATTTAAAGTAGGGGTTAGAACAGTT<br>AAATTTTG  |
| T4   | GTTCTTCTCCTTTGCTAGCCATCGTTTCGGAGGCTACGCGATCGATAGGTTATTATAACCACACACTCCAATATATTTATACTGTCCTCGTCTAA<br>CTTTAGTCTCTAAACGTTTCTCGTGTGATACTTATCCTAGTTAATATGGTTACTACGTAAAAC TTGCAGTATCCCCCGAAGTAGGGGTTAGAACAG<br>TAAATTTTG  |
| T5   | GTTCTTCTCCTTTGCTAGCCATCGTTTCGACTAGCTATTATGGGTAAATCTGAACAAC TGTAGTAACTGGAAAATCGTTGTTTTTATAAACTACAC<br>TGCTAGAGCTATCCCTCTGAGTTAAGAATTCGTTGAAGTCTATCGTCCTACTACACGTAATTCGTTCTATTCACTAAAGTAGGGGTTAGAACAGT<br>TAAATTTTG  |
| T6   | GTTCTTCTCCTTTGCTAGCCATCGTTTCGACTAATTAGGGGAAGCGTTTCTTACAGCTACTGAATCTAGTGC GTTACCTCTATACGTATAAGTAC<br>TGTGAAACCAATGCTATCTACTATATTCGTTAACTTTTTATATATTTAATGTTTTTTTTAATAA CACTGGCTATTTAAAGTAGGGGTTAGAACAGTT<br>AAATTTTG |
| T7   | GTTCTTCTCCTTTGCTAGCCATCGTTTCGGGGTCTAGGAAGGAGCGAGTTCTACAAACACGATGGGGGGATGAAGCTCCTATTATTTAATGTAG<br>ATCTAGAGTAATCGTATTTATATTTAATTATGGGGGTGATCAAGGATACTAGACTTACAATCCTCTAATCTGACTGAAAGTAGGGGTTAGAACAG<br>GTTAAATTTTG   |
| T8   | GTTCTTCTCCTTTGCTAGCCATCGTTTCGAGACTAATCAGATAATGAGTACGGGAGAAGAGAAAATCTAAGTAGACTACTCGTAGCGAACGTTA<br>CCCTCGTTCTACTATGCTTTTATACTATCGAACAAATAGACTATTCTATAAAAAAGTATTCTTGGGATTCGTCCCTAAGTAGGGGTTAGAACAG<br>GTTAAATTTTG    |

**Supplementary Table 4 (cont.)** – List of primers used to clone the synthetic promoters of group T

| Name       | Sequence                                                                                                                                                                                                             |
|------------|----------------------------------------------------------------------------------------------------------------------------------------------------------------------------------------------------------------------|
| <b>T9</b>  | GTTCTTCTCCTTTGCTAGCCATCGTTTCGATAGGATTATGGTGTAGGACAGCACTCACCTATCAAATTCGTTTTTCCTACTCGTACCCTTCTAATA<br>TTCCAATTCTAAATAGGACTATTATATCGGATGTTACACTGCGCCTTATATACTTGGCTATCAAATCTCTAAAGTTAAGTAGGGGTTAGAACAGTT<br>AAATTTTG     |
| <b>T10</b> | GTTCTTCTCCTTTGCTAGCCATCGTTTCGGTAAAAGACTACTTCGGCTATCTAAAAGTTTAAACAGTTCAGGGTTTATCGCAAGATTACTCGAGTA<br>ACTGATTTCCCTAAGATAAGTTTTTCGCGAACTCACCTAGGAGGTACCTTTTATAATGGATGTCCTTGGTAAGAGAGAAAAGTAGGGGTTAGAACAG<br>GTTAAATTTTG |
| <b>T11</b> | GTTCTTCTCCTTTGCTAGCCATCGTTTCGATCCTTAGTAAGAATCTTCTAGAAAAGGCAAATAGATATCTCTCTCTAGTTGCTATGGTTGGTTT<br>CCAGGCTACCTTGACCAAATTTTCTATGTCTAGCTTCAGACGATCTATTTTTATATAAAAGTAAATGTTTATAACAAAGTAGGGGTTAGAACAGTT<br>AAATTTTG       |
| <b>T12</b> | GTTCTTCTCCTTTGCTAGCCATCGTTTCGCGGCTCTCCTTCTGTTTATCGATATTCTAATTTATCGATGGTTATGTTGCGACGTGTTCTAACCTAT<br>ATTCTGGGAGATTATTTATAACTGATAAACTGTCTATTATAGTTTTCTAACTGTGGCTATAGATTTTCAGGGTGATTAAGTAGGGGTTAGAACAGTT<br>AAATTTTG    |
| <b>T13</b> | GTTCTTCTCCTTTGCTAGCCATCGTTTCGGGCTTTTCTCAAACGATTTCTTATCGGACCGATATTAGTGTTAACTATATAATATTCGCCGGAAC<br>GGAGACTAGATATATTAACCTTATATAGACGTAGTTCGTCTAGAATTCAAGTCGTATAGTGAGAAGTTTAGCTAAGAAGTAGGGGTTAGAACAG<br>TTAAATTTTG       |
| <b>T14</b> | GTTCTTCTCCTTTGCTAGCCATCGTTTCGTATTCTAAGACTAGAATACTATCACTAATCTAGAACGGGAGATGTAGGCTCGAGAGATCCAGTCT<br>GCGTAAATATAGCGCCACCAAACGTAAGTATGTTTTACCAAAGTACGACCCCTATTGTTTCTACCAATAAGTAGGGGTTAGAACAG<br>TTAAATTTTG               |
| <b>T15</b> | GTTCTTCTCCTTTGCTAGCCATCGTTTCGGATAACTATAATAGTATATAGGGAGCTATAATAATGCAAATTCCTCGGTGGTTGGAAATTACTT<br>TAAATATTATAATTTATATACTAGTCGCCCGTTCGTATGCCAAGATATATTCGTTTTGCCACTATCGTTTTCGTTTAAAGTAGGGGTTAGAACAGTT<br>AAATTTTG       |
| <b>T16</b> | GTTCTTCTCCTTTGCTAGCCATCGTTTCGTATTTTTCTAACCAGCGTAGGATGGTAAATGAAATGTAGATCTATGGGTTGCGTTACTACTTTCCA<br>GATTCGTTTTAATTTACAAATATAAGTATAGCTTATATACAGTAGATATATGATTGGACGATCAACAAGACGTATAAGTAGGGGTTAGAACAGT<br>TAAATTTTG       |

**Supplementary Table 4 (cont.)** – List of primers used to clone the synthetic promoters of group T

| Name | Sequence                                                                                                                                                                                                            |
|------|---------------------------------------------------------------------------------------------------------------------------------------------------------------------------------------------------------------------|
| T17  | GTTCTTCTCCTTTGCTAGCCATCGTTTCGTCAACGTATTAGGCAAGAATATTTTTATGTAAAAAGCTTCTTAAATTCGGACTATAGTAGTTCCTC<br>CCCTTCCCCTACGCCGCAAAGTTTGTTTTGATCGTTTATATAGATTTCGGTTCTGTACCTTGATCCCAAGCAAAAAAGTAGGGGTTAGAACAGT<br>TAAATTTTG      |
| T18  | GTTCTTCTCCTTTGCTAGCCATCGTTTCGCAACTATTATGGGCTCTGTTATCAGTAGTATTCGATGTTTCAGTAGTGTGTCTATGTTTATCGAAGAT<br>CTCTGTAGTTACCAATGGTGCATTTTTCTACCGTTTTTATACTATCCAGACAGTTAATCTATCGGCCTCCTAGAAGTAGGGGTTAGAACAGT<br>TAAATTTTG      |
| T19  | GTTCTTCTCCTTTGCTAGCCATCGTTTCGTATGATATATAGCTATAAACTTACACGTCAGGAATATGTTCACTCTCGCAACAAATCACACACTAAC<br>CCCTATAAATTCGTTTAGCTTTCGTTCTAACAGTGTCTGGTAGAGTACTTATATAAATTTATAACAAGATCAATTAAGTAGGGGTTAGAACAGTT<br>AAATTTTG     |
| T20  | GTTCTTCTCCTTTGCTAGCCATCGTTTCGCTTATAAACTTATGCAATGATCAACTAAATCTACGAATTAGATAATATTTGCACGCGAGGTTACCTT<br>CTATACGATAACCTGATATTTATAAACTGAGAACCCCAAAGAAAGGTTTTAAGTATCTAACACTATCGTGCAACAAGTAGGGGTTAGAACAGT<br>TAAATTTTG      |
| T21  | GTTCTTCTCCTTTGCTAGCCATCGTTTCGATATGTATCAGTACCCTAGGAATATCGTATAAATGTTCTATTTTTCTATGGAATATGGGTGTCAGCTT<br>TATATATTGTGCACCTGATAATTGTAGGACCAAATTTGGGTCGTAATCTCTACTAATCAAGATTGGCAAGAATTCTAAGTAGGGGTTAGAACAGT<br>TAAATTTTG   |
| T22  | GTTCTTCTCCTTTGCTAGCCATCGTTTCGAATAAGAGTTTTATGTACTTAACGTAACCTGGAAAACGGACAACTAAGCTACTAAGTAAGCTA<br>TGTTAGTACGCGTCTATATCTATTGAATGTCTAATTAAGAGATTATTTATAACTACCTAAAATTAATACCGTCACGAAAGTAGGGGTTAGAACAGT<br>TAAATTTTG       |
| T23  | GTTCTTCTCCTTTGCTAGCCATCGTTTCGAGCTTCTACTATTTCAACTAGAGTTCTAAATCTTAAAAGTAAATTCGTATCTCAGATTGGGGATTTCG<br>TCGGTGGAAGGATACAACCTTTTATAAGAAATTACTACGAATAGACTTTTAAATGATACAATCAATGTGGGTTAAACGAAGTAGGGGTTAGAACAGT<br>TAAATTTTG |
| T24  | GTTCTTCTCCTTTGCTAGCCATCGTTTCGTAAGCTATAGCGTGGTTTAGCTAAACAATCGAAAAATCTCTGGGGTAACTAGAGCGCTTAATA<br>GGTACTTGTGCTAAATTTGTAAGTATAAATTTACGAGCGAGACAATATTTATAGACTGCCCTAAGTAAGTTCGAAATTAAGTAGGGGTTAGAACAG<br>TTAAATTTTG      |



**Supplementary Table 4 (cont.)** – List of primers used to clone the synthetic promoters of group T

| Name | Sequence                                                                                                                                                                                                         |
|------|------------------------------------------------------------------------------------------------------------------------------------------------------------------------------------------------------------------|
| T25  | GTTCTTCTCCTTTGCTAGCCATCGTTTCGGTGATTAATATACCTATTCTCGTGGAACGAACGGGGTCAGTTTTGGGTCTGAAGATCGTCAATCT<br>CCTGAATTTATACGATATCAGATAATGTTTTGATGAGGTGAGATTGACTTGCAGGACCACCTTTTATAGTCTATATAAGTAGGGGTTAGAACAGT<br>TAAATTTTG   |
| T26  | GTTCTTCTCCTTTGCTAGCCATCGTTTCGTACCTTCCTATACTACTCTAGAATGTAACCTATAATCTTAATAACTTCTATCTGCTTTTTATCGATTC<br>GAATCTAGATGTTTGATTATGCTTTAAATGAAAAATTCTAACGACTTCAGCTTTTATAGATAAACCTAGAGGAGGAAGTAGGGGTTAGAACAGTTA<br>AATTTTG |
| T27  | GTTCTTCTCCTTTGCTAGCCATCGTTTCGAACAGAAAAAGAATGTGATGTTAAAAGCTTTTTACGTGCAAATACCCTCACTTCAGATATCGGAAC<br>AACAAAGGGTATGCTATACAAACGAAAGGTTACTGAGGGACTTGACCTACGTCTGTGACGGTTTATATACTAGTAAAAAGTAGGGGTTAGAACAG<br>TTAAATTTTG |
| T28  | GTTCTTCTCCTTTGCTAGCCATCGTTTCGAATAAAAATAAGTTTTCTTTAACTAGTTATAACAGTTTTACTAGACTTATACTTCTATAGGTTATTCTA<br>AGTTATACAATAATCTAGACAGCAATAAGCTATATTTATAGAAAACCGAGCCTTATCTATCGTGAAAACGAGCTAAGTAGGGGTTAGAACAGTTA<br>AATTTTG |

**Supplementary Table 5** – List of primers used to clone the synthetic promoters of group A

| Name | Sequence                                                                                                                                                                                                          |
|------|-------------------------------------------------------------------------------------------------------------------------------------------------------------------------------------------------------------------|
| A1   | GTTCTTCTCCTTTGCTAGCCATCGTTTCGTTTTGTTGTTGTTTGCGAATATACTAATTCAGCTTAATGAACACCTAACTATACTCTTTTTGAAATA<br>CAAGTGGGGGTGACTATTTACCTACAGGTGTCAAGTTCTAAAGGTATTTAAATCCCTTTTATAAGGTAATTTATAAGTAGGGGTTAGAACAGTT<br>AAATTTTG    |
| A2   | GTTCTTCTCCTTTGCTAGCCATCGTTTCGTCTTAAATGTTGAGCCGCACCTGGGCACAAAGAAAGTATTGCGTTGTTATACGACCTTGCGGCC<br>GACGAAATGCTATTATGATAATGCTTGATGTAGTGGGTACAAGATTATTGTGTAATAATTTTATACAACCTAAGAATATAAGTAGGGGTTAGAACA<br>GTTAAATTTTG  |
| A3   | GTTCTTCTCCTTTGCTAGCCATCGTTTCGATAACGCTACTGAGGATTCTTTAACTGCGTATGATCTAGCTCTAGAATTATTTTATTCTCGTTAGTT<br>ACTCCTTATATACCTAAGATAGTTTACGCCGAACCTCGCTCAATTGATCAACGTTATCTAACTTGAGCTTTAAAGTGAAGTAGGGGTTAGAACAGT<br>TAAATTTTG |

**Supplementary Table 5 (cont.)** – List of primers used to clone the synthetic promoters of group A

| Name       | Sequence                                                                                                                                                                                                         |
|------------|------------------------------------------------------------------------------------------------------------------------------------------------------------------------------------------------------------------|
| <b>A4</b>  | GTTCTTCTCCTTTGCTAGCCATCGTTTCGACCACTTTACTGACAGCTACCCAGAAGGGGACTAAGATATCGGATTTGTGGGAGTTAAAGAAGTT<br>AATAACAACGTGTATAGATAAAAATCTTTTTATAATGAACAAGCTTACTGTATTCGCACAACGAAGTCGCTTTGCTTAAAGTAGGGGTTAGAACA<br>GTTAAATTTTG |
| <b>A5</b>  | GTTCTTCTCCTTTGCTAGCCATCGTTTCGAGCACAAATTTGAGCTAATTGATGCTATGCTAGGAACTTTCTGTTGATCGTTACTATGTTTTTAGT<br>TATAGAAGGCTATCAATTCTCGATTGTTGATAAACGGGGATCTAACTTTTATACTCAAAAACAACGGGAAATTAGGAAGTAGGGGTTAGAACAGT<br>TAAATTTTG  |
| <b>A6</b>  | GTTCTTCTCCTTTGCTAGCCATCGTTTCGGTGTGCTTGACAATCCTCCTAGCACTGGCTTTGTTCTTTGACCTACTGAATTCCTCTAGTAAATAC<br>TACTGTGTAATATTTATATACGGGAGTCGAAAGCCCAGCAAACCTTTCTCTATCTACAACAAAATGTACTACTAACCAAGTAGGGGTTAGAACAG<br>TTAAATTTTG |
| <b>A7</b>  | GTTCTTCTCCTTTGCTAGCCATCGTTTCGAGATACTAAATTTCTGTGGGATTTGATTGATCTACGCTACCACGTAGAACAATATTAACCAATAC<br>TATCTGGCACTTATGCGAATTCTTGAGATATTGTTCAAGATTCCAATATAAGCTTTTATATCTGTGTTCTTCAATAAAGTAGGGGTTAGAACAGTT<br>AAATTTTG   |
| <b>A8</b>  | GTTCTTCTCCTTTGCTAGCCATCGTTTCGGATGGATTAATGGGTAGCTGTATGACGATAGTATAACTTTTTGATGACTTTAATTTAACCTCGACTCA<br>AGTAAACTTTATGTCGCTAATTCTTGATCTAATTTCTTATATATAACTAGACAATCAGGACCCTAACTATGATTAAGTAGGGGTTAGAACAGTT<br>AAATTTTG  |
| <b>A9</b>  | GTTCTTCTCCTTTGCTAGCCATCGTTTCGGGATCCTATGAGACGTATTTCTTCTATTGGATTGTTTCAATCTACTATGAAGGTGATCGTCTACTAC<br>AGCCACCCCTACTCCAACCTAATACTTTTATATGGGTTGGTTTCTTTGCCCGATTCCGCTAATAATACAAATTTTAAGTAGGGGTTAGAACAGT<br>TAAATTTTG  |
| <b>A10</b> | GTTCTTCTCCTTTGCTAGCCATCGTTTCGCTTACGGCTAGTAAGTACTTGATTCCGACCCCTATATACAGGATATTTGATTGGGAACTATCGTA<br>TAAGCTTACGTGCTCTATCTTAGGTAGGGAAAAACACCACTATCTACAGAACCTATCGTTTTTATTTATATATTAATAAGTAGGGGTTAGAACAGT<br>TAAATTTTG  |
| <b>A11</b> | GTTCTTCTCCTTTGCTAGCCATCGTTTCGGGTATCTCTAGACTATTGCGACTTTCTACTACAACCCACTACTAATTGATTGCGTCTATAGATCTTC<br>GAACACTATATGGATTTAAAAGTACTTTTATAATGCTATTCTAAGAATTACTTTAAGAATTGGATGTTAATTCAATAAGTAGGGGTTAGAACAGTTA<br>AATTTTG |

**Supplementary Table 5 (cont.)** – List of primers used to clone the synthetic promoters of group A

| Name       | Sequence                                                                                                                                                                                                             |
|------------|----------------------------------------------------------------------------------------------------------------------------------------------------------------------------------------------------------------------|
| <b>A12</b> | GTTCTTCTCCTTTGCTAGCCATCGTTTCGTTGTAAGTAACTACTAAAAGTTAATATTAAGGTATTACTATGGATCGCTCTAATTTCAATCTTATACGTTTG<br>TCTAACTCGCTCAAATATTTATACGAAATCTTATATTGGTTAAGGTTGAAAACCTCAATTTAGGTTACACACGATAAGTAGGGGTTAGAACAGTTA<br>AATTTTG |
| <b>A13</b> | GTTCTTCTCCTTTGCTAGCCATCGTTTCGACAAATTGCTATTTTTATTGTCTTAATAGTATCTGTAGATTATTGATATATGATATAGAGGTAAGTCTT<br>TTCCAGAATAGAAAGGTCAGTACTAGTCTTTCTGTACAACCTAAACCGTAATTTTTATATTGACCAAATAGAAAGAGAAGTAGGGGTTAGAACAGTT<br>AAATTTTG  |
| <b>A14</b> | GTTCTTCTCCTTTGCTAGCCATCGTTTCGACTATAGGTTTCTGTTGGTAATTACGTTTACTCTTATCGTGGTGGTACAAAAATACTAAAGTATCA<br>AATCTTGAATTTATAGAACTAACTAAGTGGATACCTATTACTACCTAGTTACTATTATAATTATATATATGAAAAAAGTAGGGGTTAGAACAGTTA<br>AATTTTG       |
| <b>A15</b> | GTTCTTCTCCTTTGCTAGCCATCGTTTCGTTCTACCCTTTCCAATATATCGGGATATTGATTAATAAATTACTGCTAAGCGCGAGGCTTATATAAGG<br>GTATGTAACGAGAGGAATATCTTTCAGGGTCAACGTTGGATTACCCTATTTTACCTATTATATAAGGGTTGCGAGTAAGTAGGGGTTAGAACAG<br>TTAAATTTTG    |
| <b>A16</b> | GTTCTTCTCCTTTGCTAGCCATCGTTTCGCAGCTTGCCTAACCTATTCTAAATGTAAATTGCACTATCTACTTACTTATATCTTTCTAGCAACGT<br>AAGTAGTTGGAAGTATTACTCAAAAATTCAATTTCTTTTATACCAGATCAATTACCAGTCTATGTGCGACTTATGTAAGTAGGGGTTAGAACAGTT<br>AAATTTTG      |
| <b>A17</b> | GTTCTTCTCCTTTGCTAGCCATCGTTTCGCCTACTAATCTATGGGATAAAGAAGTGAAATTGATGCGATTGCGTGACAAAGAGAGCTATACTTAC<br>TCTGTCTTATTAGTTTTACTGTGGCTTTTTATATATTTCTACTTTAAGACTAGATTGACCTATTTAGAATATATAATAAGTAGGGGTTAGAACAGTT<br>AAATTTTG     |
| <b>A18</b> | GTTCTTCTCCTTTGCTAGCCATCGTTTCGTAGTGGCTGTATGTAGTCTCAATTCTAATATTCTTATCAATTGATTATTTTGGTTGAATGTAGGTAC<br>TAATCTTATAAATTAAGAAGGTTAATAAATCTTAACTCAATGAGAGAATAGTTTACAATTTTTTATATCTAACAGAAGTAGGGGTTAGAACAGTTA<br>AATTTTG      |
| <b>A19</b> | GTTCTTCTCCTTTGCTAGCCATCGTTTCGCCTATAATTGGGAGAAACGAGGATAGTTGAATTCTAGCTCCTATAGTATGAACGGTTATGTAAAGG<br>AATGAGATGCTATCTTATATACGAACTTGAGTTTAAAAGGTTATTTTTCTTAAATACTCCACCCAATGGAATTTAGTAAGTAGGGGTTAGAACAGT<br>TAAATTTTG     |

**Supplementary Table 5 (cont.)** – List of primers used to clone the synthetic promoters of group A

| Name       | Sequence                                                                                                                                                                                                           |
|------------|--------------------------------------------------------------------------------------------------------------------------------------------------------------------------------------------------------------------|
| <b>A20</b> | GTTCTTCTCCTTTGCTAGCCATCGTTTCGTAATATATTTATTATTGTTACACCTCTCTGCTATGGAGTTACGACTCGTCGACGGGATATGTTTACTA<br>GGAGGTCTTACAGGGTAGATCTTTCGAAACTAGTGATTTATATATATCTTTTTCTATGACCTCCTAGTACGTTATCAAGTAGGGGTTAGAACAGT<br>TAAATTTTG  |
| <b>A21</b> | GTTCTTCTCCTTTGCTAGCCATCGTTTCGCTTTAACTACGTCGAGGGACCTCTATTTAGTCTGGCCGAGTTGCGTAGCTAAAGTTTAAGATCTAC<br>TAAAGTTTAGTATGTGTTTCGATAATGATTTTCTCTCACGTTTCGCTTTTCGAAGTTTTTTCGCCTTTTATAATCGTTAAAGTAGGGGTTAGAACAGT<br>TAAATTTTG |
| <b>A22</b> | GTTCTTCTCCTTTGCTAGCCATCGTTTCGTGTCTACAACCTACTAATCAACTCACTACGACTTTAATAGTCAACAAGAGAACGAAAGAGATTCTC<br>CAAATACAATCTTTGTTTATATATGTGATGTGCGATTAAGTCTTCCTATCTACTAATGTACACTGCAGTGAGGATGTCAAGTAGGGGTTAGAACAG<br>TTAAATTTTG  |
| <b>A23</b> | GTTCTTCTCCTTTGCTAGCCATCGTTTCGAAGTGATCGTAAGAGAATTTGAATCTTGACTAAGCTAGGCTTAGGTGTTGAAGTAAGCGCAAATGA<br>ACTTAATCTTGTTTGCTCTTTAGTAAAATTCAGTGATTGGAGATCACTTTTATAGAGAACAAGTATTTTCGTCAGCAAAGTAGGGGTTAGAACAGT<br>TAAATTTTG   |
| <b>A24</b> | GTTCTTCTCCTTTGCTAGCCATCGTTTCGTATTTGGCTGCCCGTTACGTAACCCAAAAATAGTGAATTTCTGCGCCGAATAGTTCTGTTTCAGTGG<br>GCCTTCTACTATGTATGGGAGCAAAAACCAACACCCTTATATAAGTATTCTACAAATTAATCTTGGCACCCAAAAGAAAGTAGGGGTTAGAACAG<br>TTAAATTTTG  |
| <b>A25</b> | GTTCTTCTCCTTTGCTAGCCATCGTTTCGATTAACAATACGCTTACCTCGCAATTTGGTATCTAGATTGCTTAAGCAGGCCAATCCTTAATGTGC<br>TTTCTTCTCGTTGTCAATTAATCTGATTGACGCTTTCTATTATTTATACCCGTCTTGGTGAATTCAACTATATAGAAAAGTAGGGGTTAGAACAGT<br>TAAATTTTG   |
| <b>A26</b> | GTTCTTCTCCTTTGCTAGCCATCGTTTCGAATGATATAGAAATGTCCTATATGTAATTCTAAGACAGTCTAATTTTCTATATAAAAATTGCAACTACT<br>ATCTAGGAAACTGCAATGTCACACAGTAAAAACCTGGGCCTTATCTTATATATGTTAGAGCCTATCCTTAGTGACAAGTAGGGGTTAGAACAGTT<br>AAATTTTG  |
| <b>A27</b> | GTTCTTCTCCTTTGCTAGCCATCGTTTCGAATAGGAGTGAAGGTATAATTCTGACTCTGAGCTTTTTTGTAGTAAATGTTTCGCTAGATAGATATC<br>TATGATTAGTACTAGTAAAATAGTCCCTGAATATTATAATGTATTAGTGTCCCAGATTTTTTGTAGTTTATATACTGAAGTAGGGGTTAGAACAGTTA<br>AATTTTG  |
| <b>A28</b> | GTTCTTCTCCTTTGCTAGCCATCGTTTCGACCCTTCCGATTATTAATGTTACGGTACCTTCTTTGTTGAAATGTTTGAAGAATTGTTTCTTCCGT<br>TTAAACCAAGAGTTGCTTGTACTGCGTTGGTATATTTGGTATACAACCTCCTACTTTATATATTTCTGCCCTATCGAAGTAGGGGTTAGAACAGT<br>TAAATTTTG    |

**Supplementary Table 6** – List of primers used test the ten best synthetic core promoters fused to different CRMs in *P. pastoris* and *S. cerevisiae*

| Name                     | Sequence                                                                             |
|--------------------------|--------------------------------------------------------------------------------------|
| <b>CAT-core</b>          | AAAGTTCTTCTCCTTTGCTAGCCATCGTTTCGTTTAATTGTAAGTCTTGACTAGAGCAAG                         |
| <b>CAT-CRM-forw</b>      | GCTGGCCTTTTGCTCACATGTATTTAAATTAATCGAACTCCGAATGCGGTTTC                                |
| <b>DAS-core</b>          | GAAAAGTTCTTCTCCTTTGCTAGCCATCGTTTCGTTTGTTTCGATTATTCTCCAGATAAAATCAACAATAGTTG           |
| <b>DAS-CRM-forw</b>      | GCTGGCCTTTTGCTCACATGTATTTAAATAGCAATGATATAAACAACAATTGAGTGACAGG                        |
| <b>GAP-core</b>          | GAAAAGTTCTTCTCCTTTGCTAGCCATCGTTTCGTGTGTTTTGATAGTTGTTCAATTGATTGAAATAGG                |
| <b>GAP-CRM-forw</b>      | GCTGGCCTTTTGCTCACATGTATTTAAATTTTTGTAGAAATGTCTTGGTGTCTCG                              |
| <b>CAT-CRM-rev</b>       | TCCAACAAAGAGGCAACAGAGGTCGGCGGCCACTGGGTGCTACTGATGAGCAACAGAGGCTATCAC                   |
| <b>DAS-CRM-rev</b>       | TCCAACAAAGAGGCAACAGAGGTCGGCGGCCACTGGGTGCTATGCTTTAGTTCTTTTTGAACCCAAAGGCTATCTGATGAAAAG |
| <b>GAP-CRM-rev</b>       | TCCAACAAAGAGGCAACAGAGGTCGGCGGCCACTGGGTGCTAGTGGTTTCCAATAATCTCATGACATGCG               |
| <b>seqTomato19-41rev</b> | CGCATGAACTCCTTGATAACTTC                                                              |
| <b>ADH-CRM-rev</b>       | TCCAACAAAGAGGCAACAGAGGTCGGCGGCCACTGGGTGCTAAGACAGCAAACCTTTTTTTTATTTCAAATTCAGTAAC      |
| <b>GAL-CRM-rev</b>       | TCCAACAAAGAGGCAACAGAGGTCGGCGGCCACTGGGTGCTAGATCAAAAATCATCGCTTCGCTGA                   |
| <b>GPD-CRM-rev</b>       | TCCAACAAAGAGGCAACAGAGGTCGGCGGCCACTGGGTGCTAAAGTAGGGGAATAATTTTCAGGGAAGT                |
| <b>A28-GFP-rev</b>       | AAAAGTTCTTCTCCTTTGCTAGCCATCGTTTCGACCCTTCCGATTATTAATGTTACGGTA                         |
| <b>T28-GFP-rev</b>       | GAAAAGTTCTTCTCCTTTGCTAGCCATCGTTTCGAATAAAATAAGGTTTCTTTAACTAGTTATAACAGTTTTACTAG        |
| <b>A27-GFP-rev</b>       | GAAAAGTTCTTCTCCTTTGCTAGCCATCGTTTCGAATAGGAGTGAAGGTATAATTCTGACTCTGAG                   |
| <b>T27-GFP-rev</b>       | GAAAAGTTCTTCTCCTTTGCTAGCCATCGTTTCGAACAGAAAAGAATGTGATGTTAAAAGCTTTTTACG                |
| <b>T26-GFP-rev</b>       | AAAGTTCTTCTCCTTTGCTAGCCATCGTTTCGTACCTTGGTATACTACTCTAGAATGTAA                         |
| <b>T25-GFP-rev</b>       | GAAAAGTTCTTCTCCTTTGCTAGCCATCGTTTCGGTGATTAAATATACCTATTCTCGTGGAACGAAC                  |
| <b>M28-GFP-rev</b>       | GAAAAGTTCTTCTCCTTTGCTAGCCATCGTTTCGTATAAATAATGTAATAACTTTAAGATATGGATTGCACTTG           |
| <b>T24-GFP-rev</b>       | GAAAAGTTCTTCTCCTTTGCTAGCCATCGTTTCGTAAGTACTGAGCTATAGCGTGGTTTAGC                       |
| <b>T23-GFP-rev</b>       | GAAAAGTTCTTCTCCTTTGCTAGCCATCGTTTCGAGCTTCTACTATTTCAACTAGAGTTCTAAATCTTAAAAG            |
| <b>T22-GFP-rev</b>       | GAAAAGTTCTTCTCCTTTGCTAGCCATCGTTTCGAATAAGAGTTTTATGTACTTAACGTACTACCTGG                 |

**Supplementary Table 6 (cont.)** – List of primers used test the ten synthetic core promoters with different CRMs in *P. pastoris* and *S. cerevisiae*

| Name        | Sequence                                                         |
|-------------|------------------------------------------------------------------|
| A28-CAT-for | GTGATAGCCTCTGTTGCTCATCAGCGATAGGGCAGAAATATATAAAGTAGGAGG           |
| T28-CAT-for | GTGATAGCCTCTGTTGCTCATCAGAGCTCGTTTTACGATAGATAAGGCTC               |
| A27-CAT-for | GTGATAGCCTCTGTTGCTCATCAGCAGTATATAAACTAAAAAATCTGGGACACTAATAC      |
| T27-CAT-for | GTGATAGCCTCTGTTGCTCATCAGTTTACTAGTATATAAACCGTCACAGACGTAGG         |
| T26-CAT-for | GTGATAGCCTCTGTTGCTCATCAGCCTCCTCTAGGTTTATCTATAAAGCTGAAG           |
| T25-CAT-for | GTGATAGCCTCTGTTGCTCATCAGATATAGACTATAAAGGTGGTCCTGCAAG             |
| M28-CAT-for | GTGATAGCCTCTGTTGCTCATCAGGTAATCTTTTCGGTCAATTGTGATCTCTC            |
| T24-CAT-for | GTGATAGCCTCTGTTGCTCATCAGAATTTTGAACCTTACTTAGGGCAGTC               |
| T23-CAT-for | GTGATAGCCTCTGTTGCTCATCAGCGTTTAACCCACATTGATTGTATCATTAAAAG         |
| T22-CAT-for | GTGATAGCCTCTGTTGCTCATCAGTCGTGACGGTATTAATTTTAGGTAG                |
| A28-DAS-for | GCCTTTGGGTTCAAAAAAGAACTAAAGCACGATAGGGCAGAAATATATAAAGTAGGAGG      |
| T28-DAS-for | GCCTTTGGGTTCAAAAAAGAACTAAAGCAAGCTCGTTTTACGATAGATAAGGCTC          |
| A27-DAS-for | GCCTTTGGGTTCAAAAAAGAACTAAAGCACAGTATATAAACTAAAAAATCTGGGACACTAATAC |
| T27-DAS-for | CCTTTGGGTTCAAAAAAGAACTAAAGCATTACTAGTATATAAACCGTCACAGACGTAGG      |
| T26-DAS-for | GCCTTTGGGTTCAAAAAAGAACTAAAGCACCTCCTCTAGGTTTATCTATAAAGCTGAAG      |
| T25-DAS-for | GCCTTTGGGTTCAAAAAAGAACTAAAGCAATATAGACTATAAAGGTGGTCCTGCAAG        |
| M28-DAS-for | GCCTTTGGGTTCAAAAAAGAACTAAAGCAGTAATCTTTTCGGTCAATTGTGATCTCTC       |
| T24-DAS-for | GCCTTTGGGTTCAAAAAAGAACTAAAGCAAATTTTGAACCTTACTTAGGGCAGTC          |
| T23-DAS-for | CCTTTGGGTTCAAAAAAGAACTAAAGCACGTTTAACCCACATTGATTGTATCATTAAAAG     |
| T22-DAS-for | GCCTTTGGGTTCAAAAAAGAACTAAAGCATCGTGACGGTATTAATTTTAGGTAG           |

**Supplementary Table 6 (cont.)** – List of primers used test the ten synthetic core promoters with different CRMs in *P. pastoris* and *S. cerevisiae*

| Name               | Sequence                                                                |
|--------------------|-------------------------------------------------------------------------|
| <b>A28-GAP-for</b> | CGCATGTCATGAGATTATTGAAACCACCGATAGGGCAGAAATATATAAAGTAGGAGG               |
| <b>T28-GAP-for</b> | CGCATGTCATGAGATTATTGAAACCACAGCTCGTTTTACGATAGATAAGGCTC                   |
| <b>A27-GAP-for</b> | CATGTCATGAGATTATTGAAACCACAGTATATAAACTAAAAAATCTGGGACACTAATAC             |
| <b>T27-GAP-for</b> | CGCATGTCATGAGATTATTGAAACCACCTTTACTAGTATATAAACCGTCACAGACGTAGG            |
| <b>T26-GAP-for</b> | CGCATGTCATGAGATTATTGAAACCACCCTCCTCTAGGTTTATCTATAAAAGCTGAAG              |
| <b>T25-GAP-for</b> | CGCATGTCATGAGATTATTGAAACCACATATAGACTATAAAAGGTGGTCCTGCAAG                |
| <b>M28-GAP-for</b> | CGCATGTCATGAGATTATTGAAACCACGTAATCTTTCGGTCAATTGTGATCTCTC                 |
| <b>T24-GAP-for</b> | CGCATGTCATGAGATTATTGAAACCACAATTTCGAACTTACTTAGGGCAGTC                    |
| <b>T23-GAP-for</b> | CGCATGTCATGAGATTATTGAAACCACCGTTTAACCCACATTGATTGTATCATTAAG               |
| <b>T22-GAP-for</b> | CGCATGTCATGAGATTATTGAAACCACCTCGTGACGGTATTAATTTTAGGTAG                   |
| <b>A28-ADH-for</b> | GTTACTTGAATTTGAAATAAAAAAAGTTTGCTGTCTCGATAGGGCAGAAATATATAAAGTAGGAGG      |
| <b>T28-ADH-for</b> | TACTTGAATTTGAAATAAAAAAAGTTTGCTGTCTAGCTCGTTTTACGATAGATAAGGC              |
| <b>A27-ADH-for</b> | GTTACTTGAATTTGAAATAAAAAAAGTTTGCTGTCTCAGTATATAAACTAAAAAATCTGGGACACTAATAC |
| <b>T27-ADH-for</b> | GTTACTTGAATTTGAAATAAAAAAAGTTTGCTGTCTTTTACTAGTATATAAACCGTCACAGACGTAGG    |
| <b>T26-ADH-for</b> | GTTACTTGAATTTGAAATAAAAAAAGTTTGCTGTCTCCTCCTCTAGGTTTATCTATAAAAGCTGAAG     |
| <b>T25-ADH-for</b> | GTTACTTGAATTTGAAATAAAAAAAGTTTGCTGTCTATATAGACTATAAAAGGTGGTCCTGCAAG       |
| <b>M28-ADH-for</b> | ACTTGAATTTGAAATAAAAAAAGTTTGCTGTCTGTAATCTTTCGGTCAATTGTGATCTC             |
| <b>T24-ADH-for</b> | GTTACTTGAATTTGAAATAAAAAAAGTTTGCTGTCTAATTTCGAACTTACTTAGGGCAG             |
| <b>T23-ADH-for</b> | GTTACTTGAATTTGAAATAAAAAAAGTTTGCTGTCTCGTTTAACCCACATTGATTGTATCATTAAG      |
| <b>T22-ADH-for</b> | TACTTGAATTTGAAATAAAAAAAGTTTGCTGTCTTTCGTGACGGTATTAATTTTAGGTA             |

**Supplementary Table 6 (cont.)** – List of primers used test the ten synthetic core promoters with different CRMs in *P. pastoris* and *S. cerevisiae*

| Name               | Sequence                                                     |
|--------------------|--------------------------------------------------------------|
| <b>A28-GAL-for</b> | TCAGCGAAGCGATGATTTTTGATCCGATAGGGCAGAAATATATAAAGTAGGAGG       |
| <b>T28-GAL-for</b> | TCAGCGAAGCGATGATTTTTGATCAGCTCGTTTTACGATAGATAAGGCTC           |
| <b>A27-GAL-for</b> | TCAGCGAAGCGATGATTTTTGATCCAGTATATAAACTAAAAAATCTGGGACACTAATAC  |
| <b>T27-GAL-for</b> | TCAGCGAAGCGATGATTTTTGATCTTTACTAGTATATAAACCGTCACAGACGTAGG     |
| <b>T26-GAL-for</b> | TCAGCGAAGCGATGATTTTTGATCCCTCCTCTAGGTTTATCTATAAAAGCTGAAG      |
| <b>T25-GAL-for</b> | TCAGCGAAGCGATGATTTTTGATCATATAGACTATAAAAGGTGGTCCTGCAAG        |
| <b>M28-GAL-for</b> | TCAGCGAAGCGATGATTTTTGATCGTAATCTTTCGGTCAATTGTGATCTCTC         |
| <b>T24-GAL-for</b> | TCAGCGAAGCGATGATTTTTGATCAATTTTGAACCTTACTTAGGGCAGTC           |
| <b>T23-GAL-for</b> | TCAGCGAAGCGATGATTTTTGATCCGTTTAACCCACATTGATTGTATCATTAAAAG     |
| <b>T22-GAL-for</b> | TCAGCGAAGCGATGATTTTTGATCTCGTGACGGTATTAATTTTAGGTAG            |
| <b>A28-GPD-for</b> | CAGTCCCTGAAATTATTCCCCTACTTCGATAGGGCAGAAATATATAAAGTAGGAGG     |
| <b>T28-GPD-for</b> | CAGTCCCTGAAATTATTCCCCTACTTAGCTCGTTTTACGATAGATAAGGCTC         |
| <b>A27-GPD-for</b> | GTTCCCTGAAATTATTCCCCTACTTCAGTATATAAACTAAAAAATCTGGGACACTAATAC |
| <b>T27-GPD-for</b> | CAGTCCCTGAAATTATTCCCCTACTTTTTACTAGTATATAAACCGTCACAGACGTAGG   |
| <b>T26-GPD-for</b> | CAGTCCCTGAAATTATTCCCCTACTTCCTCCTCTAGGTTTATCTATAAAAGCTGAAG    |
| <b>T25-GPD-for</b> | CAGTCCCTGAAATTATTCCCCTACTTATATAGACTATAAAAGGTGGTCCTGCAAG      |
| <b>M28-GPD-for</b> | CAGTCCCTGAAATTATTCCCCTACTTGTAATCTTTCGGTCAATTGTGATCTCTC       |
| <b>T24-GPD-for</b> | CAGTCCCTGAAATTATTCCCCTACTTAATTTTGAACCTTACTTAGGGCAGTC         |
| <b>T23-GPD-for</b> | CAGTCCCTGAAATTATTCCCCTACTTCGTTTAACCCACATTGATTGTATCATTAAAAG   |
| <b>T22-GPD-for</b> | CAGTCCCTGAAATTATTCCCCTACTTTCGTGACGGTATTAATTTTAGGTAG          |



**Supplementary Table 7** – Group P synthetic core promoters TATA box position and positive and negative motifs frequency and position

| Promoter name | Positive motifs frequency and position |          |      |          |     |          |      |          |      | Negative motifs frequency and position |      |          |      | TATA box position |          |
|---------------|----------------------------------------|----------|------|----------|-----|----------|------|----------|------|----------------------------------------|------|----------|------|-------------------|----------|
|               | TTTT                                   | Position | TTCT | Position | CAA | Position | ATCA | Position | CAAT | Position                               | AAGA | Position | AGCG |                   | Position |
| P1            | 0                                      | -        | 0    | -        | 0   | -        | 0    | -        | 0    | -                                      | 0    | -        | 0    | -                 | -        |
| P2            | 0                                      | -        | 0    | -        | 0   | -        | 0    | -        | 0    | -                                      | 0    | -        | 0    | -                 | -        |
| P3            | 0                                      | -        | 0    | -        | 0   | -        | 0    | -        | 0    | -                                      | 0    | -        | 0    | -                 | -        |
| P4            | 0                                      | -        | 0    | -        | 0   | -        | 0    | -        | 0    | -                                      | 0    | -        | 0    | -                 | -        |
| P5            | 0                                      | -        | 0    | -        | 0   | -        | 0    | -        | 0    | -                                      | 0    | -        | 0    | -                 | -        |
| P6            | 0                                      | -        | 0    | -        | 0   | -        | 0    | -        | 0    | -                                      | 0    | -        | 0    | -                 | -        |
| P7            | 0                                      | -        | 0    | -        | 0   | -        | 0    | -        | 0    | -                                      | 0    | -        | 0    | -                 | -        |
| P8            | 0                                      | -        | 0    | -        | 0   | -        | 0    | -        | 0    | -                                      | 0    | -        | 0    | -                 | -        |
| P9            | 0                                      | -        | 0    | -        | 0   | -        | 0    | -        | 0    | -                                      | 0    | -        | 0    | -                 | -        |
| P10           | 0                                      | -        | 0    | -        | 0   | -        | 0    | -        | 0    | -                                      | 0    | -        | 0    | -                 | -        |
| P11           | 0                                      | -        | 0    | -        | 0   | -        | 0    | -        | 0    | -                                      | 0    | -        | 0    | -                 | -        |
| P12           | 0                                      | -        | 0    | -        | 0   | -        | 0    | -        | 0    | -                                      | 0    | -        | 0    | -                 | -        |
| P13           | 0                                      | -        | 0    | -        | 0   | -        | 0    | -        | 0    | -                                      | 0    | -        | 0    | -                 | -        |
| P14           | 0                                      | -        | 0    | -        | 0   | -        | 0    | -        | 0    | -                                      | 0    | -        | 0    | -                 | -        |
| P15           | 0                                      | -        | 0    | -        | 0   | -        | 0    | -        | 0    | -                                      | 0    | -        | 0    | -                 | -        |
| P16           | 0                                      | -        | 0    | -        | 0   | -        | 0    | -        | 0    | -                                      | 0    | -        | 0    | -                 | -        |
| P17           | 0                                      | -        | 0    | -        | 0   | -        | 0    | -        | 0    | -                                      | 0    | -        | 0    | -                 | -        |
| P18           | 0                                      | -        | 0    | -        | 0   | -        | 0    | -        | 0    | -                                      | 0    | -        | 0    | -                 | -        |
| P19           | 0                                      | -        | 0    | -        | 0   | -        | 0    | -        | 0    | -                                      | 0    | -        | 0    | -                 | -        |
| P20           | 0                                      | -        | 0    | -        | 0   | -        | 0    | -        | 0    | -                                      | 0    | -        | 0    | -                 | -        |
| P21           | 0                                      | -        | 0    | -        | 0   | -        | 0    | -        | 0    | -                                      | 0    | -        | 0    | -                 | -        |
| P22           | 0                                      | -        | 0    | -        | 0   | -        | 0    | -        | 0    | -                                      | 0    | -        | 0    | -                 | -        |
| P23           | 0                                      | -        | 0    | -        | 0   | -        | 0    | -        | 0    | -                                      | 0    | -        | 0    | -                 | -        |
| P24           | 0                                      | -        | 0    | -        | 0   | -        | 0    | -        | 0    | -                                      | 0    | -        | 0    | -                 | -        |

**Supplementary Table 7 (cont.)** – Group P synthetic core promoters TATA box position and positive and negative motifs frequency and position

| Promoter name | Positive motifs frequency and position |          |      |          |     |          |      |          |      | Negative motifs frequency and position |      |          |      | TATA box position |          |
|---------------|----------------------------------------|----------|------|----------|-----|----------|------|----------|------|----------------------------------------|------|----------|------|-------------------|----------|
|               | TTTT                                   | Position | TTCT | Position | CAA | Position | ATCA | Position | CAAT | Position                               | AAGA | Position | AGCG |                   | Position |
| P25           | 0                                      | -        | 0    | -        | 0   | -        | 0    | -        | 0    | -                                      | 0    | -        | 0    | -                 | -        |
| P26           | 0                                      | -        | 0    | -        | 0   | -        | 0    | -        | 0    | -                                      | 0    | -        | 0    | -                 | -        |
| P27           | 0                                      | -        | 0    | -        | 0   | -        | 0    | -        | 0    | -                                      | 0    | -        | 0    | -                 | -        |
| P28           | 0                                      | -        | 0    | -        | 0   | -        | 0    | -        | 0    | -                                      | 0    | -        | 0    | -                 | -        |

**Supplementary Table 8** – Group M synthetic core promoters TATA box position and positive and negative motifs frequency and position

| Promoter name | Positive motifs frequency and position |          |      |          |     |                    |      |          |      | Negative motifs frequency and position |      |            |      | TATA box position |          |
|---------------|----------------------------------------|----------|------|----------|-----|--------------------|------|----------|------|----------------------------------------|------|------------|------|-------------------|----------|
|               | TTTT                                   | Position | TTCT | Position | CAA | Position           | ATCA | Position | CAAT | Position                               | AAGA | Position   | AGCG |                   | Position |
| M1            | 1                                      | -67      | 0    | -        | 0   | -                  | 0    | -        | 0    | -                                      | 1    | -148       | 0    | -                 | -        |
| M2            | 0                                      | -        | 1    | -90      | 1   | -26                | 0    | -        | 0    | -                                      | 1    | -109       | 1    | -119              | -        |
| M3            | 0                                      | -        | 0    | -        | 4   | -49; -46; -23; -16 | 1    | -59      | 0    | -                                      | 1    | -73        | 1    | -117              | -        |
| M4            | 0                                      | -        | 1    | -83      | 2   | -49; -10           | 0    | -        | 1    | -49                                    | 2    | -123; -105 | 0    | -                 | -        |
| M5            | 1                                      | -69      | 0    | -        | 2   | -34; -13           | 0    | -        | 1    | -13                                    | 0    | -          | 0    | -                 | -        |
| M6            | 0                                      | -        | 0    | -        | 0   | -                  | 2    | -60; -30 | 0    | -                                      | 2    | -104; -88  | 1    | -118              | -        |
| M7            | 1                                      | -62      | 0    | -        | 0   | -                  | 0    | -        | 0    | -                                      | 2    | -135; -127 | 0    | -                 | -        |
| M8            | 0                                      | -        | 1    | -94      | 0   | -                  | 0    | -        | 0    | -                                      | 0    | -          | 1    | -83               | -        |
| M9            | 0                                      | -        | 1    | -81      | 0   | -                  | 1    | -32      | 0    | -                                      | 1    | -106       | 0    | -                 | -        |
| M10           | 0                                      | -        | 0    | -        | 1   | -30                | 0    | -        | 0    | -                                      | 0    | -          | 0    | -                 | -        |

**Supplementary Table 8 (cont.)** – Group M synthetic core promoters TATA box position and positive and negative motifs frequency and position

| Promoter name | Positive motifs frequency and position |          |      |                  |     |                       |      |                       |      |                  | Negative motifs frequency and position |                     |      |                    | TATA box position |
|---------------|----------------------------------------|----------|------|------------------|-----|-----------------------|------|-----------------------|------|------------------|----------------------------------------|---------------------|------|--------------------|-------------------|
|               | TTTT                                   | Position | TTCT | Position         | CAA | Position              | ATCA | Position              | CAAT | Position         | AAGA                                   | Position            | AGCG | Position           |                   |
| M11           | 0                                      | -        | 0    | -                | 0   | -                     | 0    | -                     | 0    | -                | 0                                      | -                   | 1    | -103               | -                 |
| M12           | 1                                      | -80      | 0    | -                | 1   | -27                   | 0    | -                     | 1    | -27              | 0                                      | -                   | 0    | -                  | -                 |
| M13           | 0                                      | -        | 0    | -                | 0   | -                     | 0    | -                     | 0    | -                | 0                                      | -                   | 3    | -123;<br>-110; -88 | -                 |
| M14           | 0                                      | -        | 1    | -59              | 1   | -23                   | 1    | -54                   | 1    | -23              | 0                                      | -                   | 0    | -                  | -                 |
| M15           | 0                                      | -        | 3    | -88;<br>-71; -63 | 1   | -20                   | 0    | -                     | 0    | -                | 1                                      | -101                | 0    | -                  | -                 |
| M16           | 1                                      | -96      | 0    | -                | 0   | -                     | 1    | -37                   | 0    | -                | 3                                      | -126; -123;<br>-110 | 0    | -                  | -                 |
| M17           | 0                                      | -        | 0    | -                | 2   | -20; -16              | 0    | -                     | 0    | -                | 0                                      | -                   | 0    | -                  | -                 |
| M18           | 0                                      | -        | 0    | -                | 4   | -50; -37;<br>-21; -15 | 2    | -60; -52              | 0    | -                | 0                                      | -                   | 0    | -                  | -                 |
| M19           | 0                                      | -        | 1    | -96              | 1   | -17                   | 0    | -                     | 0    | -                | 1                                      | -116                | 1    | -87                | -                 |
| M20           | 1                                      | -96      | 0    | -                | 1   | -10                   | 0    | -                     | 1    | -10              | 1                                      | -100                | 0    | -                  | -                 |
| M21           | 1                                      | -72      | 2    | -89; -78         | 2   | -44; -34              | 1    | -46                   | 0    | -                | 0                                      | -                   | 0    | -                  | -                 |
| M22           | 0                                      | -        | 1    | -95              | 1   | -42                   | 0    | -                     | 0    | -                | 0                                      | -                   | 0    | -                  | -                 |
| M23           | 0                                      | -        | 1    | -89              | 3   | -43;<br>-30; -22      | 1    | -45                   | 3    | -43; -30;<br>-22 | 0                                      | -                   | 0    | -                  | -                 |
| M24           | 0                                      | -        | 0    | -                | 1   | -19                   | 2    | -63; -37              | 0    | -                | 1                                      | -67                 | 0    | -                  | -                 |
| M25           | 0                                      | -        | 0    | -                | 2   | -50; -32              | 4    | -69; -60;<br>-54; -42 | 1    | -50              | 0                                      | -                   | 0    | -                  | -                 |
| M26           | 0                                      | -        | 0    | -                | 0   | -                     | 0    | -                     | 0    | -                | 1                                      | -112                | 0    | -                  | -                 |
| M27           | 0                                      | -        | 0    | -                | 0   | -                     | 1    | -64                   | 0    | -                | 1                                      | -58                 | 1    | -87                | -                 |
| M28           | 0                                      | -        | 0    | -                | 2   | -46; -40              | 0    | -                     | 1    | -40              | 1                                      | -87                 | 0    | -                  | -                 |

**Supplementary Table 9** – Group T synthetic core promoters TATA box position and positive and negative motifs frequency and position

| Promoter name | Positive motifs frequency and position |          |      |          |     |          |      |          |      | Negative motifs frequency and position |      |          |      | TATA box position |          |
|---------------|----------------------------------------|----------|------|----------|-----|----------|------|----------|------|----------------------------------------|------|----------|------|-------------------|----------|
|               | TTTT                                   | Position | TTCT | Position | CAA | Position | ATCA | Position | CAAT | Position                               | AAGA | Position | AGCG |                   | Position |
| T1            | 0                                      | -        | 0    | -        | 0   | -        | 0    | -        | 0    | -                                      | 0    | -        | 0    | -                 | -124     |
| T2            | 0                                      | -        | 0    | -        | 0   | -        | 0    | -        | 0    | -                                      | 0    | -        | 0    | -                 | -134     |
| T3            | 0                                      | -        | 0    | -        | 0   | -        | 0    | -        | 0    | -                                      | 0    | -        | 0    | -                 | -110     |
| T4            | 0                                      | -        | 0    | -        | 0   | -        | 0    | -        | 0    | -                                      | 0    | -        | 0    | -                 | -58      |
| T5            | 0                                      | -        | 0    | -        | 0   | -        | 0    | -        | 0    | -                                      | 0    | -        | 0    | -                 | -65      |
| T6            | 0                                      | -        | 0    | -        | 0   | -        | 0    | -        | 0    | -                                      | 0    | -        | 0    | -                 | -116     |
| T7            | 0                                      | -        | 0    | -        | 0   | -        | 0    | -        | 0    | -                                      | 0    | -        | 0    | -                 | -93      |
| T8            | 0                                      | -        | 0    | -        | 0   | -        | 0    | -        | 0    | -                                      | 0    | -        | 0    | -                 | -95      |
| T9            | 0                                      | -        | 0    | -        | 0   | -        | 0    | -        | 0    | -                                      | 0    | -        | 0    | -                 | -125     |
| T10           | 0                                      | -        | 0    | -        | 0   | -        | 0    | -        | 0    | -                                      | 0    | -        | 0    | -                 | -126     |
| T11           | 0                                      | -        | 0    | -        | 0   | -        | 0    | -        | 0    | -                                      | 0    | -        | 0    | -                 | -130     |
| T12           | 0                                      | -        | 0    | -        | 0   | -        | 0    | -        | 0    | -                                      | 0    | -        | 0    | -                 | -93      |
| T13           | 0                                      | -        | 0    | -        | 0   | -        | 0    | -        | 0    | -                                      | 0    | -        | 0    | -                 | -100     |
| T14           | 0                                      | -        | 0    | -        | 0   | -        | 0    | -        | 0    | -                                      | 0    | -        | 0    | -                 | -110     |
| T15           | 0                                      | -        | 0    | -        | 0   | -        | 0    | -        | 0    | -                                      | 0    | -        | 0    | -                 | -93      |
| T16           | 0                                      | -        | 0    | -        | 0   | -        | 0    | -        | 0    | -                                      | 0    | -        | 0    | -                 | -111     |
| T17           | 0                                      | -        | 0    | -        | 0   | -        | 0    | -        | 0    | -                                      | 0    | -        | 0    | -                 | -116     |
| T18           | 0                                      | -        | 0    | -        | 0   | -        | 0    | -        | 0    | -                                      | 0    | -        | 0    | -                 | -117     |
| T19           | 0                                      | -        | 0    | -        | 0   | -        | 0    | -        | 0    | -                                      | 0    | -        | 0    | -                 | -128     |
| T20           | 0                                      | -        | 0    | -        | 0   | -        | 0    | -        | 0    | -                                      | 0    | -        | 0    | -                 | -97      |
| T21           | 0                                      | -        | 0    | -        | 0   | -        | 0    | -        | 0    | -                                      | 0    | -        | 0    | -                 | -79      |
| T22           | 0                                      | -        | 0    | -        | 0   | -        | 0    | -        | 0    | -                                      | 0    | -        | 0    | -                 | -123     |
| T23           | 0                                      | -        | 0    | -        | 0   | -        | 0    | -        | 0    | -                                      | 0    | -        | 0    | -                 | -98      |
| T24           | 0                                      | -        | 0    | -        | 0   | -        | 0    | -        | 0    | -                                      | 0    | -        | 0    | -                 | -124     |

**Supplementary Table 9 (cont.)** – Group T synthetic core promoters TATA box position and positive and negative motifs frequency and position

| Promoter name | Positive motifs frequency and position |          |      |          |     |          |      |          |      | Negative motifs frequency and position |      |          |      | TATA box position |          |
|---------------|----------------------------------------|----------|------|----------|-----|----------|------|----------|------|----------------------------------------|------|----------|------|-------------------|----------|
|               | TTTT                                   | Position | TTCT | Position | CAA | Position | ATCA | Position | CAAT | Position                               | AAGA | Position | AGCG |                   | Position |
| T25           | 0                                      | -        | 0    | -        | 0   | -        | 0    | -        | 0    | -                                      | 0    | -        | 0    | -                 | -141     |
| T26           | 0                                      | -        | 0    | -        | 0   | -        | 0    | -        | 0    | -                                      | 0    | -        | 0    | -                 | -132     |
| T27           | 0                                      | -        | 0    | -        | 0   | -        | 0    | -        | 0    | -                                      | 0    | -        | 0    | -                 | -141     |
| T28           | 0                                      | -        | 0    | -        | 0   | -        | 0    | -        | 0    | -                                      | 0    | -        | 0    | -                 | -115     |

**Supplementary Table 10** – Group A synthetic core promoters TATA box position and positive and negative motifs frequency and position

| Promoter name | Positive motifs frequency and position |          |      |          |     |                    |      |          |      | Negative motifs frequency and position |      |           |      | TATA box position |          |
|---------------|----------------------------------------|----------|------|----------|-----|--------------------|------|----------|------|----------------------------------------|------|-----------|------|-------------------|----------|
|               | TTTT                                   | Position | TTCT | Position | CAA | Position           | ATCA | Position | CAAT | Position                               | AAGA | Position  | AGCG |                   | Position |
| A1            | 0                                      | -        | 0    | -        | 4   | -21; -17; -14; -11 | 0    | -        | 0    | -                                      | 1    | -66       | 0    | -                 | -138     |
| A2            | 0                                      | -        | 0    | -        | 2   | -48; -19           | 0    | -        | 1    | -48                                    | 0    | -         | 0    | -                 | -136     |
| A3            | 0                                      | -        | 1    | -53      | 0   | -                  | 1    | -41      | 0    | -                                      | 0    | -         | 1    | -112              | -85      |
| A4            | 2                                      | -95; -94 | 1    | -68      | 0   | -                  | 0    | -        | 0    | -                                      | 1    | -99       | 0    | -                 | -105     |
| A5            | 0                                      | -        | 1    | -80      | 2   | -27; -18           | 1    | -55      | 1    | -27                                    | 0    | -         | 0    | -                 | -126     |
| A6            | 0                                      | -        | 0    | -        | 3   | -46; -39; -15      | 0    | -        | 0    | -                                      | 0    | -         | 0    | -                 | -92      |
| A7            | 0                                      | -        | 1    | -56      | 2   | -36; -32           | 2    | -38; -34 | 1    | -36                                    | 2    | -144; -97 | 0    | -                 | -133     |
| A8            | 0                                      | -        | 0    | -        | 1   | -48                | 1    | -50      | 0    | -                                      | 2    | -111; -98 | 1    | -91               | -118     |
| A9            | 0                                      | -        | 0    | -        | 2   | -40; -35           | 1    | -63      | 2    | -40; -35                               | 1    | -119      | 0    | -                 | -105     |
| A10           | 0                                      | -        | 0    | -        | 1   | -27                | 0    | -        | 0    | -                                      | 1    | -93       | 0    | -                 | -144     |
| A11           | 1                                      | -94      | 0    | -        | 1   | -24                | 1    | -56      | 1    | -24                                    | 1    | -72       | 0    | -                 | -105     |
| A12           | 1                                      | -90      | 0    | -        | 1   | -9                 | 0    | -        | 0    | -                                      | 2    | -108; -65 | 1    | -85               | -98      |

**Supplementary Table 10 (cont.)** – Group A synthetic core promoters TATA box position and positive and negative motifs frequency and position

| Promoter name | Positive motifs frequency and position |               |      |          |     |               |      |          |      | Negative motifs frequency and position |      |                |      | TATA box position |          |
|---------------|----------------------------------------|---------------|------|----------|-----|---------------|------|----------|------|----------------------------------------|------|----------------|------|-------------------|----------|
|               | TTTT                                   | Position      | TTCT | Position | CAA | Position      | ATCA | Position | CAAT | Position                               | AAGA | Position       | AGCG |                   | Position |
| A13           | 0                                      | -             | 2    | -87; -82 | 3   | -50; -25; -14 | 2    | -59; -52 | 3    | -50; -25; -14                          | 2    | -101; -74      | 0    | -                 | -130     |
| A14           | 3                                      | -60; -59; -58 | 1    | -91      | 1   | -23           | 0    | -        | 0    | -                                      | 1    | -79            | 0    | -                 | -143     |
| A15           | 0                                      | -             | 0    | -        | 1   | -36           | 1    | -38      | 1    | -36                                    | 1    | -96            | 0    | -                 | -70      |
| A16           | 2                                      | -99; -98      | 0    | -        | 2   | -39; -13      | 0    | -        | 1    | -39                                    | 2    | -110; -62      | 0    | -                 | -115     |
| A17           | 0                                      | -             | 0    | -        | 2   | -48; -39      | 1    | -41      | 2    | -48; -39                               | 1    | -80            | 0    | -                 | -107     |
| A18           | 0                                      | -             | 1    | -92      | 1   | -49           | 1    | -51      | 1    | -49                                    | 2    | -106; -80      | 0    | -                 | -140     |
| A19           | 0                                      | -             | 0    | -        | 2   | -35; -16      | 0    | -        | 1    | -16                                    | 2    | -123; -88      | 0    | -                 | -93      |
| A20           | 0                                      | -             | 0    | -        | 1   | -23           | 0    | -        | 1    | -23                                    | 3    | -123; -96; -82 | 0    | -                 | -119     |
| A21           | 0                                      | -             | 0    | -        | 1   | -49           | 0    | -        | 0    | -                                      | 0    | -              | 1    | -117              | -142     |
| A22           | 0                                      | -             | 1    | -58      | 0   | -             | 0    | -        | 0    | -                                      | 2    | -115; -85      | 0    | -                 | -95      |
| A23           | 1                                      | -100          | 0    | -        | 2   | -34; -27      | 0    | -        | 0    | -                                      | 2    | -92; -82       | 0    | -                 | -126     |
| A24           | 2                                      | -99; -98      | 0    | -        | 1   | -12           | 0    | -        | 0    | -                                      | 1    | -136           | 0    | -                 | -115     |
| A25           | 0                                      | -             | 0    | -        | 2   | -46; -34      | 0    | -        | 1    | -46                                    | 2    | -128; -78      | 1    | -106              | -120     |
| A26           | 1                                      | -63           | 0    | -        | 0   | -             | 0    | -        | 0    | -                                      | 1    | -121           | 0    | -                 | -126     |
| A27           | 1                                      | -93           | 0    | -        | 1   | -46           | 0    | -        | 0    | -                                      | 0    | -              | 0    | -                 | -146     |
| A28           | 0                                      | -             | 1    | -60      | 2   | -45; -42      | 0    | -        | 0    | -                                      | 1    | -69            | 0    | -                 | -135     |

**Supplementary Table 11** – Blast result for the 10 synthetic promoters with highest activity against the *P. pastoris* CBS 7435 genome. The results consist of the minimum *E*-value for each case, the presence of gaps, match localization (in the *P. pastoris* chromosome and genome and in the synthetic promoter sequence) and brief description of the sequence function in the *P. pastoris* genome.

| Seq. Name  | Min. <i>E</i> value | Gaps | Chromosome | Genome location (bp) | Syn. Seq. Location | Syn. Seq. location (from start codon) | Match description                                                                                              |
|------------|---------------------|------|------------|----------------------|--------------------|---------------------------------------|----------------------------------------------------------------------------------------------------------------|
| <b>A28</b> | 0.083               | 0    | 2          | 497292 to 497314     | 76 to 98           | -74 to -52                            | Coding sequence of catalytic subunit of (1,3)- $\beta$ -D-glucan synthase                                      |
| <b>T28</b> | 0.29                | 1    | 3          | 2049828 to 2049792   | 42 to 77           | -108 to -73                           | 130bp upstream of protein coding sequence with putative serine active lipase domain (possible promoter region) |
|            | 0.29                | 0    | 1          | 2266300 to 2266316   | 59 to 75           | -91 to -75                            | Coding sequence of putative protein with unknown function                                                      |
| <b>A27</b> | 1                   | 0    | 3          | 943316 to 943288     | 125 to 149         | -25 to -1                             | Coding sequence of hypothetical protein                                                                        |
|            | 1                   | 0    | 1          | 212956 to 212931     | 43 to 68           | -107 to -82                           | Coding region of essential component of the Rix1 complex                                                       |
| <b>T27</b> | 0.083               | 0    | 4          | 1369772 to 1369755   | 123 to 140         | -27 to -10                            | 10bp upstream of nucleolar protein coding sequence (possible promoter region)                                  |
| <b>T26</b> | 0.083               | 0    | 1          | 1928476 to 1928498   | 139 to 117         | -33 to -11                            | Inter gene sequence (between a nucleolar protein and a transcription factor)                                   |
| <b>T25</b> | 0.29                | 0    | 4          | 565027 to 565053     | 20 to 46           | -130 to -104                          | Coding sequence of hypothetical protein                                                                        |
|            | 0.29                | 0    | 2          | 1165582 to 1165601   | 33 to 52           | -117 to -98                           | Coding sequence of hypothetical protein                                                                        |
|            | 0.29                | 0    | 1          | 1209655 to 1209634   | 61 to 82           | -89 to -68                            | Coding sequence of hypothetical protein                                                                        |
| <b>M28</b> | 0.083               | 0    | 4          | 482161 to 482129     | 29 to 61           | -121 to -89                           | Coding sequence of subunit of TFIIH and nucleotide excision repair factor 3 complexes                          |
|            | 0.083               | 1    | 1          | 450941 to 450977     | 149 to 112         | -38 to -1                             | Coding sequence of Flavin adenine dinucleotide (FAD) synthetase                                                |
| <b>T24</b> | 1                   | 0    | 1          | 1442424 to 1442406   | 47 to 65           | -103 to -85                           | Coding sequence of phosphatidylserine decarboxylase of the mitochondrial inner membrane                        |
| <b>T23</b> | 0.29                | 0    | 1          | 1877072 to 1877098   | 28 to 54           | -122 to -96                           | Coding sequence of hypothetical protein                                                                        |
| <b>T22</b> | 1                   | 0    | 3          | 619259 to 619274     | 80 to 95           | -70 to -55                            | Coding sequence of Component of the ESCRT-II complex                                                           |

**Supplementary Figure 1** – Map of *P. pastoris*/*E. coli* shuttle vector pPpT4\_SB-truncatedAOX1-eGFP with main features highlighted: Restriction enzymes, eGFP, zeocin resistance marker, promoters and terminators and origin of replication.

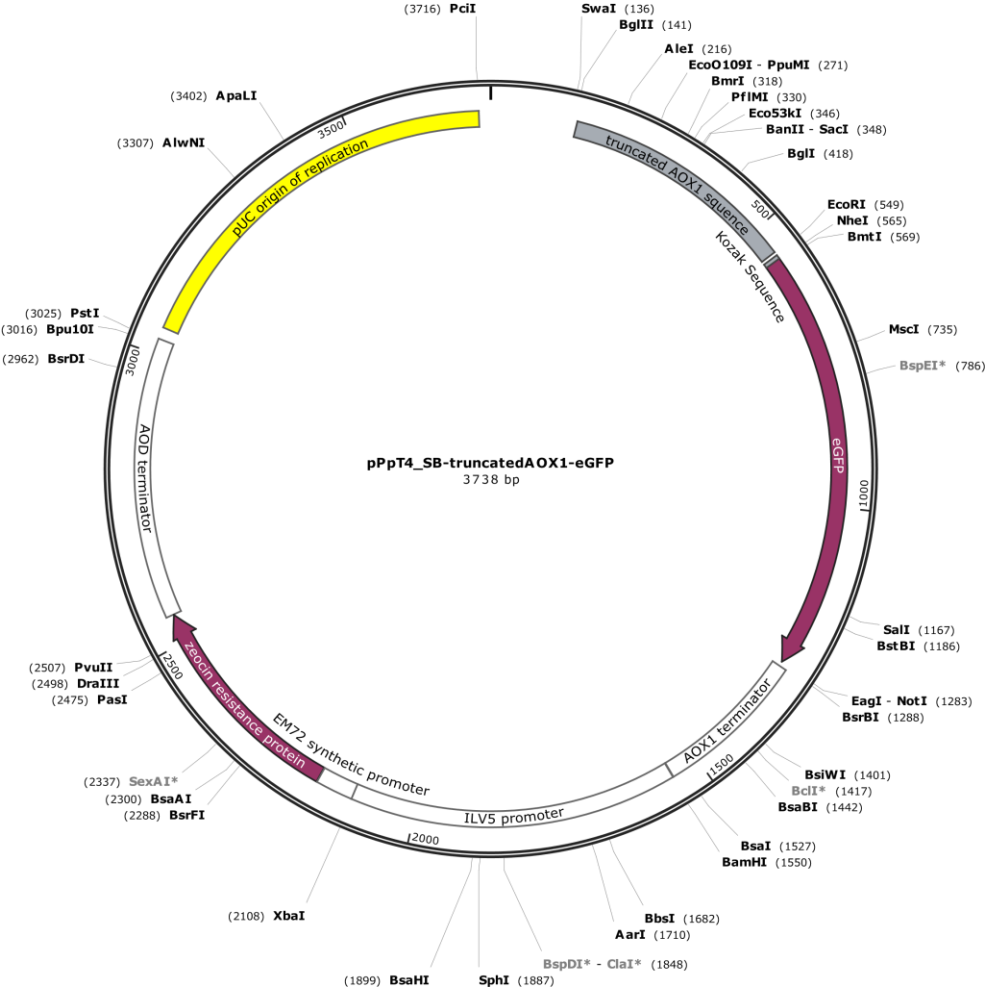



**Supplementary Figure 2 – Map of Sc\_eGFP\_RFP\_ARS with main features highlighted:**

Restriction enzymes, eGFP, sTomato (RFP), promoters and terminators, kanamycin resistance marker and autonomous replicating sequence (ARS).

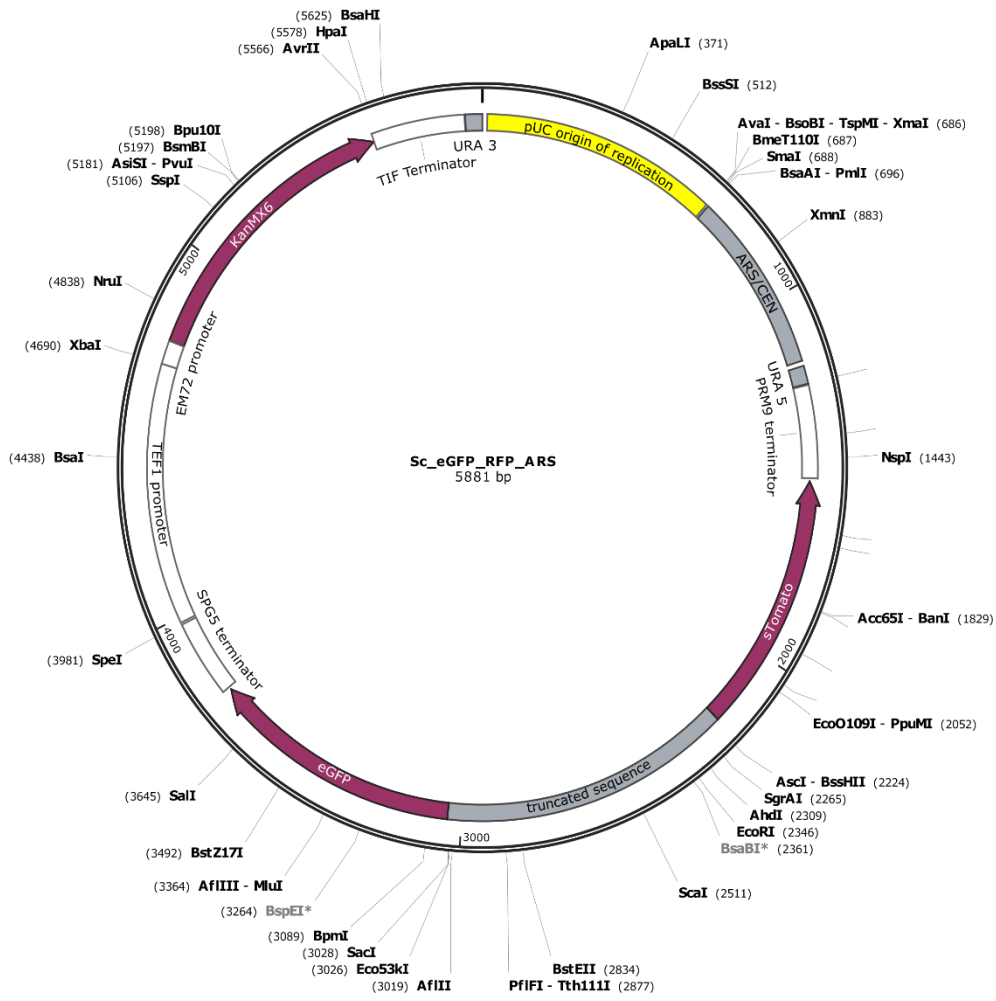

**Supplementary Figure 3** – Map of *P. pastoris*/*E. coli* shuttle vector pPpT4-bidi-sTomato-eGFP with main features highlighted: Restriction enzymes, eGFP, sTomato (RFP), zeocin resistance marker, promoters and terminators and origin of replication.

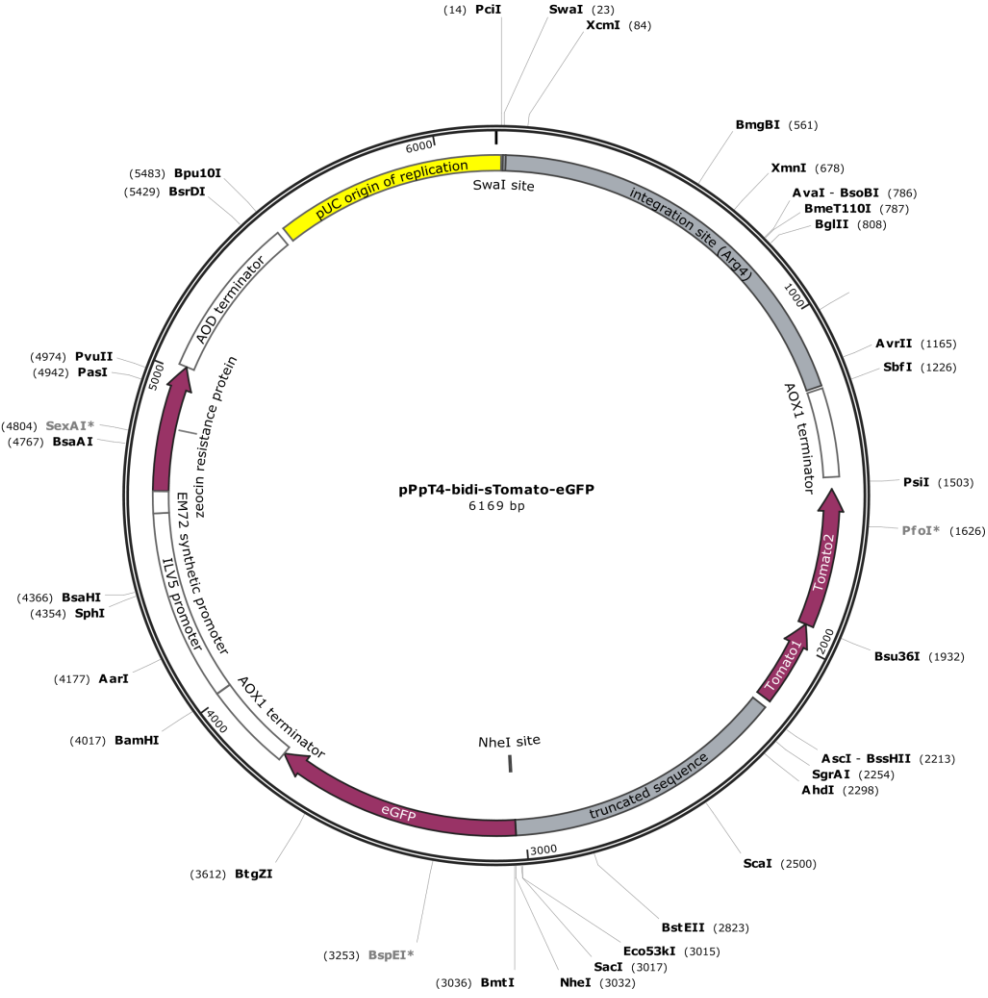

**Supplementary Figure 4 – Expression of the  $P_{AOX1}$ ,  $P_{GAP}$ ,  $P_{ScGPD1}$  and  $P_{ScADH1}$  promoters depends on the TATA box motif.** The TATA box motif in the natural promoter sequence was mutated by replaying three nucleotides of this motif by cytosine. The reporter protein fluorescence of the mutated (MUT) promoters is compared to the unmodified wildtype (WT) promoter.

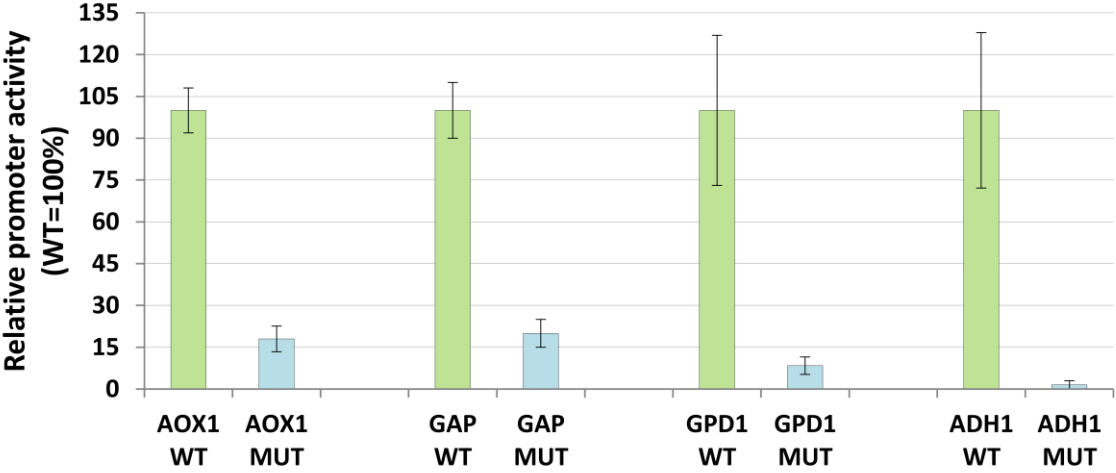

**Supplementary Figure 5 – Additional correlation diagrams for comparisons shown in main Figure 5A.** The heatmap in main Figure 5A was generated from 21 correlation diagrams. Three representative diagrams are shown as panels B-D in Figure 5 of the main manuscript, the remaining 18 are shown here.

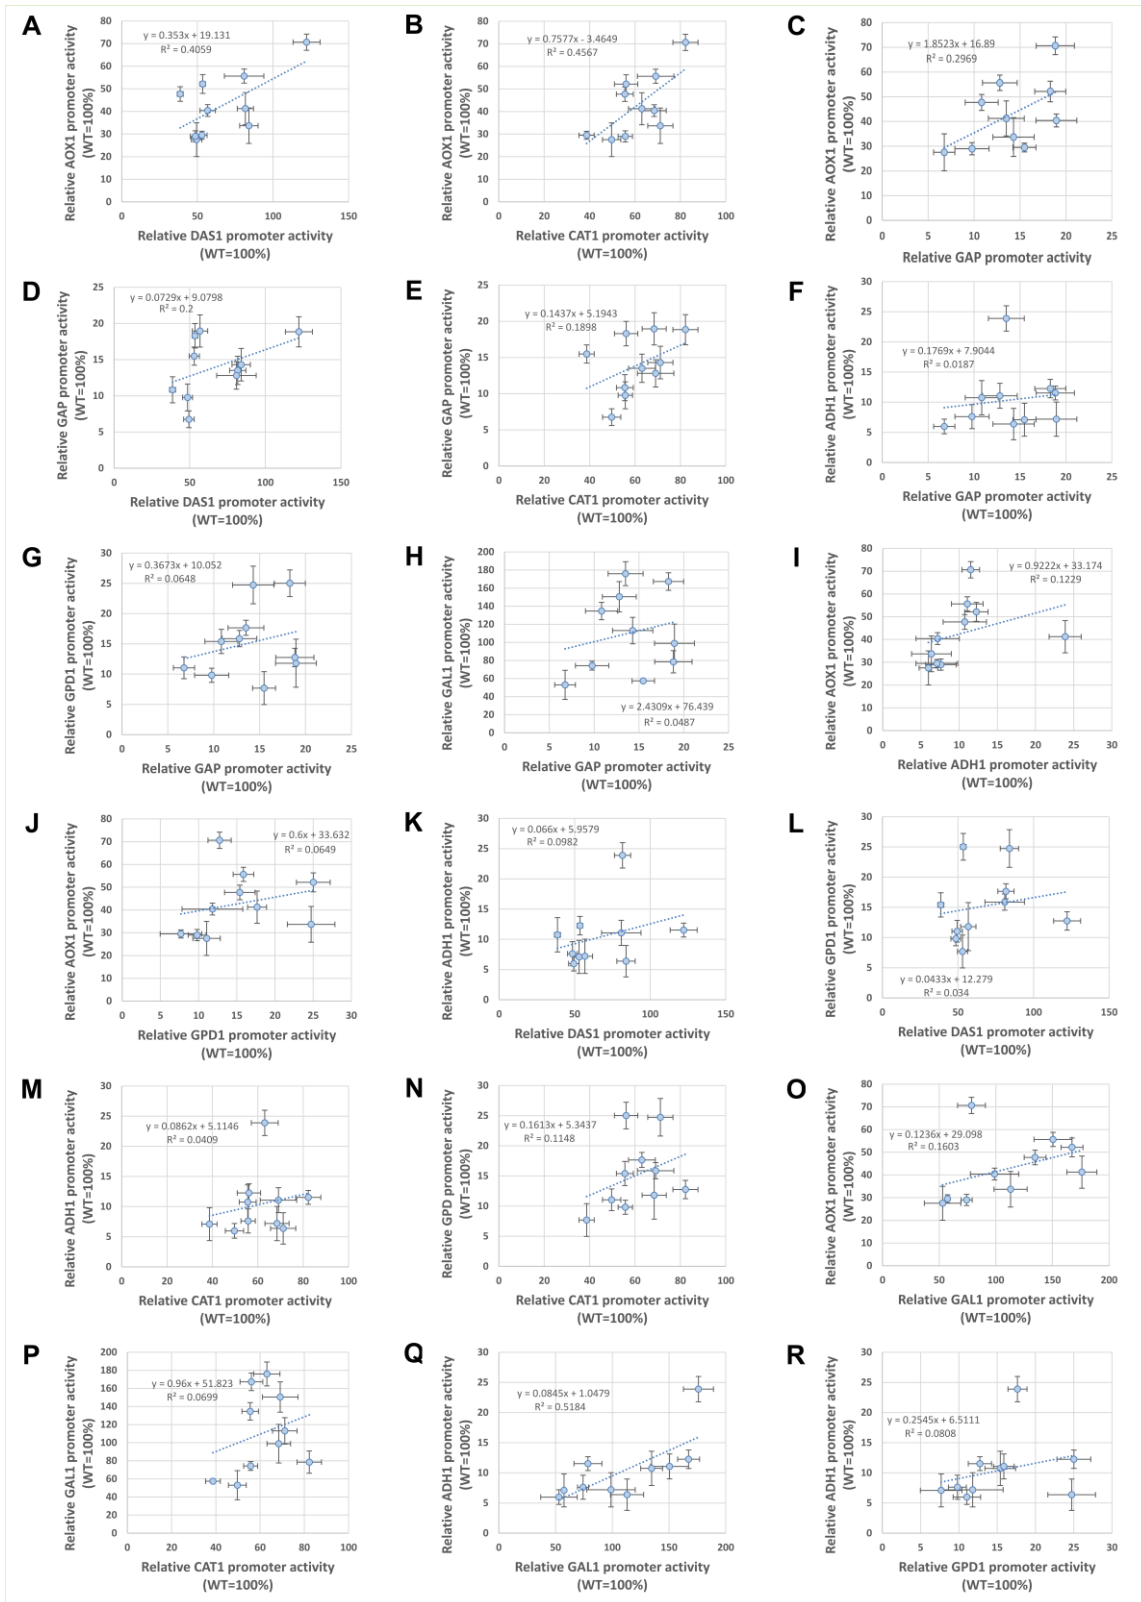

**Supplementary Figure 6– The plate reader based fluorescence measurements are in excellent agreement with flow cytometry measurements. A:**

the *P. pastoris* strains bearing the top ten synthetic core promoters fused to the *AOX1* CRM and the *AOX1* wild type core promoter were regrown in deep well plates and measured by flow cytometry (see materials and methods section). The subset of synthetic core promoters fused to the *AOX1* CRM was selected, as this inducible promoter is tightly regulated, representing worst case conditions regarding on/off behavior. The plate reader measurements shown here are identical to Figure 4B in the main manuscript. A linear regression line was calculated, the formula and  $R^2$  are shown in the figure. **B:** histograms of cell counts and respective measured fluorescence (log scale) of three representative biological replicates measurements (30000 events each) for each synthetic core promoter strain and the *AOX1* wild type promoter are shown. Note the different scaling of the y-axis for each plot. The histograms show, that the cell populations are highly similar when comparing synthetic core promoters to each other and also to the natural *AOX1* core promoter. Notably, all strains measured showed two separate fluorescence histogram peaks, indicating distinct cell population. These populations may be caused by the methanol inducible nature of our system: cells are at first grown on glucose and then induced with methanol. The different cell populations may be attributable to 'older' cells, having been grown on glucose and subsequently induced, and 'new' cells emerging from cell divisions after methanol induction and hence only grown under these conditions. These two peaks occurred for all core promoters tested (the synthetic ones and the native control) and hence these differences appear to be an inherent trait of the methanol induced yeast cells. The flow cytometry data was also used to calculate noise levels. For this purpose a squared coefficient of variance was calculated with the eight biological replicates of each strain. No clear difference was found between the synthetic core promoters and the wild type core promoter (data not shown).

**A**

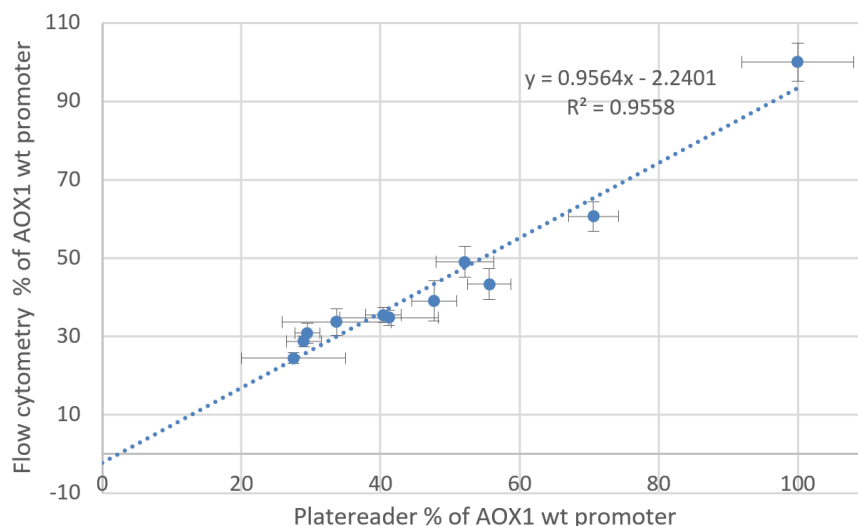

**B**

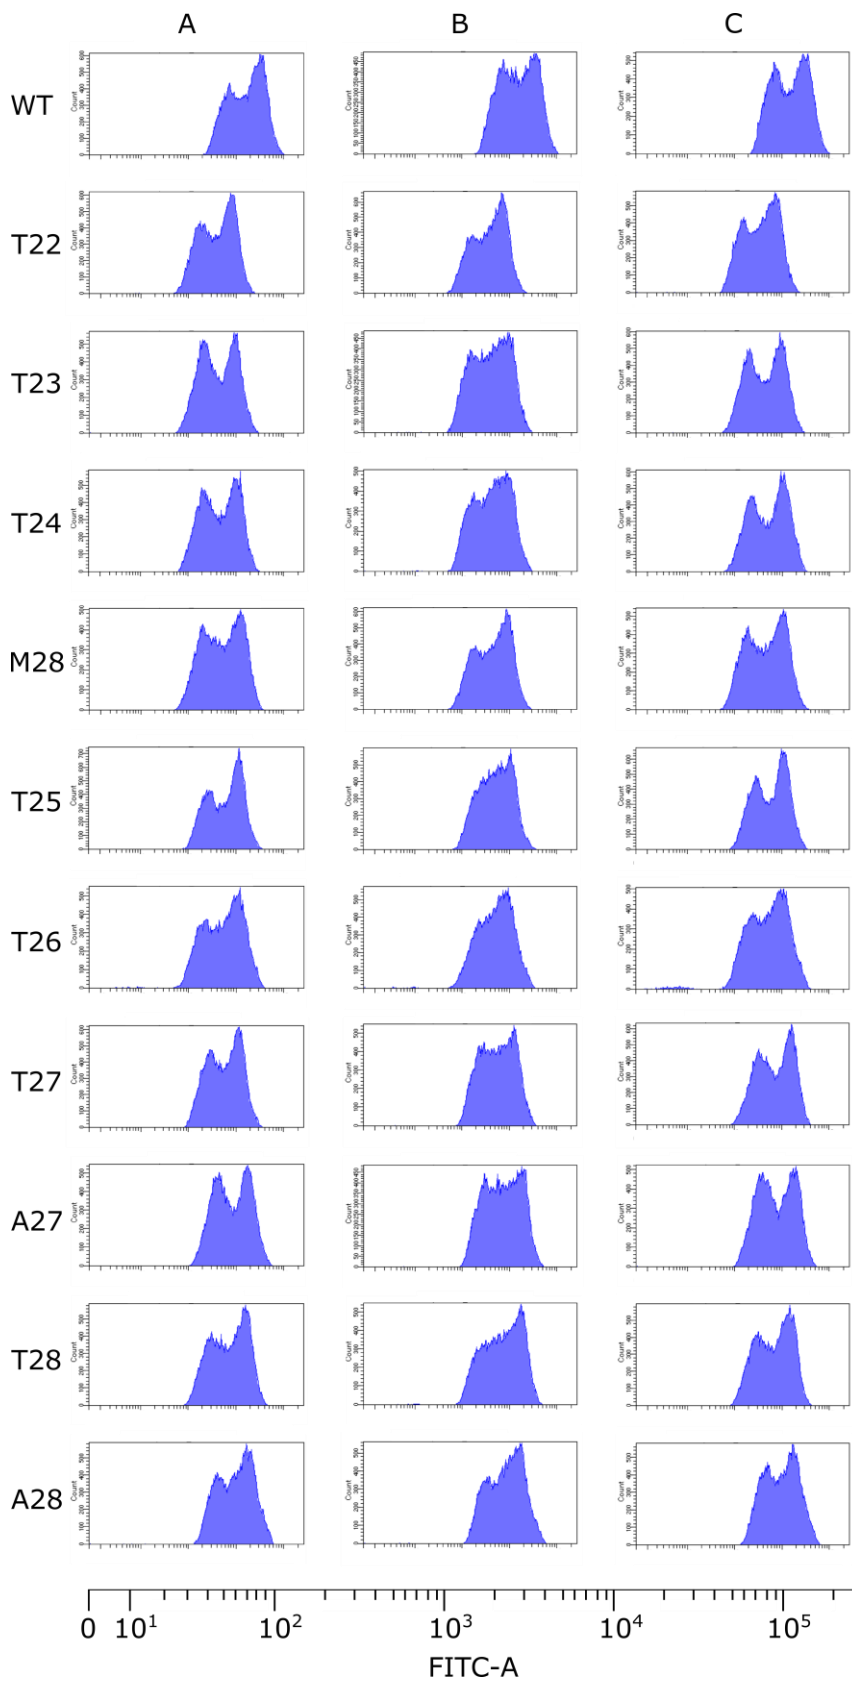

**Supplementary Figure 7 – Reporter protein fluorescence measurements under non-inducing conditions yield highly similar results as the respective natural core promoters.**

(A) controls fused to the AOX1 CRM, (B-E) four synthetic core promoters' groups fused to AOX1 CRM and (F-H) top 10 synthetic core promoters fused to other inducible CRMs (AOX1, DAS1 and CAT1). The panels shown in this figure are complementary to Figure 2 (panels A and C-F) and Figure 4 (panels B-D) in the main manuscript. In contrast to the main manuscript, where reporter protein fluorescence under methanol-induced conditions is shown, reporter protein fluorescence shown in this figure was measured 60 h after inoculation on BMD media (see methods section). The synthetic core promoters are shown in violet, and the respective wild type core promoter as control is shown in red (before induction) and green (after induction). All values represent single measurements of at least three independent cultivations in separate 96-well deep-well plates. The average and standard deviation of at least three biological replicates are shown. The AOX1 and DAS1 CRMs are tightly repressed under non-inducing conditions [24] and all fusions of synthetic core promoters to the CRMs maintained the same tight repression as the respective wild type core promoters. The CAT1 promoter CRM shows naturally a strong depression profile (expression starts when glucose is depleted [24]). Also the fusions to the synthetic core promoters to the CAT1 CRM maintained this regulatory profile. The relative strengths under depressed (shown here) and induced conditions (shown in main manuscript Figure 4 panel D) vary to a similar degree. These measurements show that the synthetic core promoters control expression strength under different conditions, while leaving the regulatory mode unaffected.

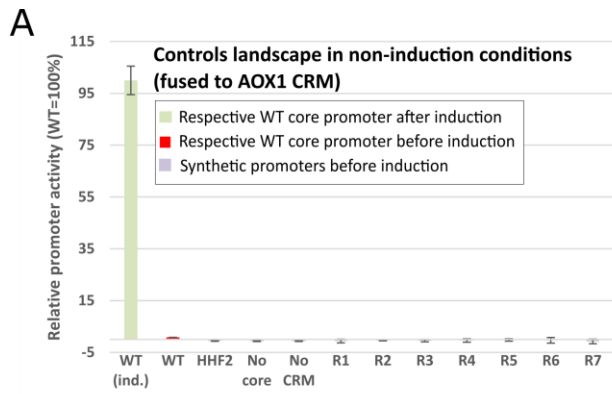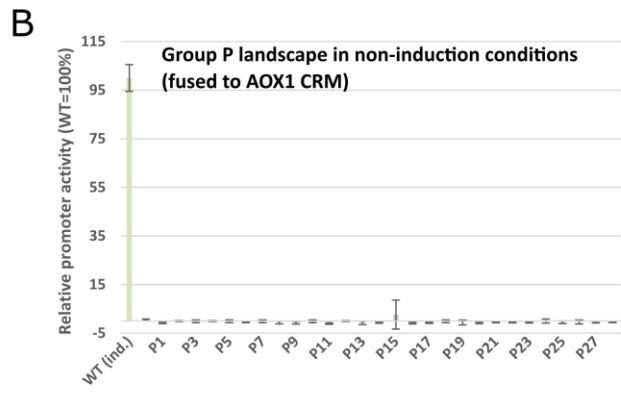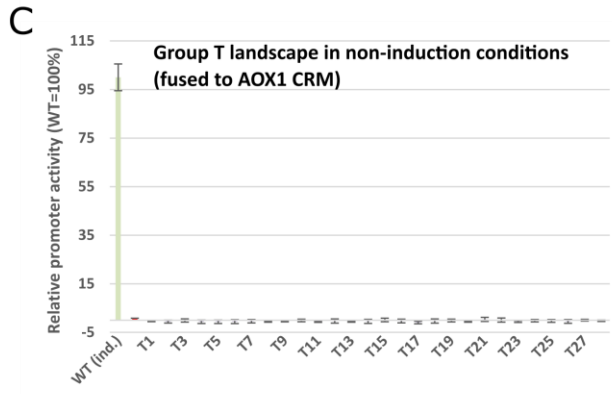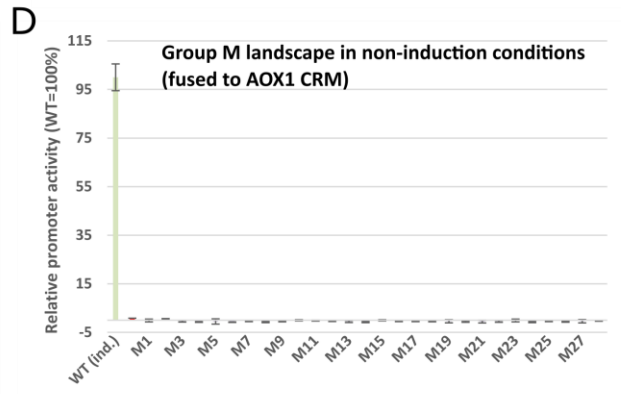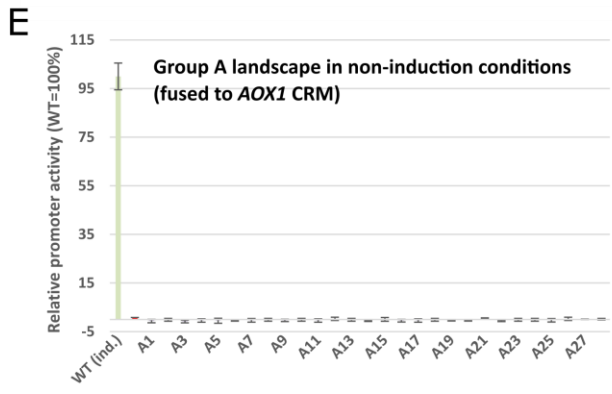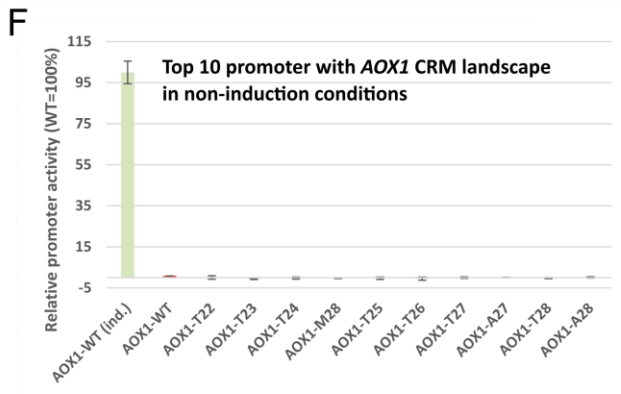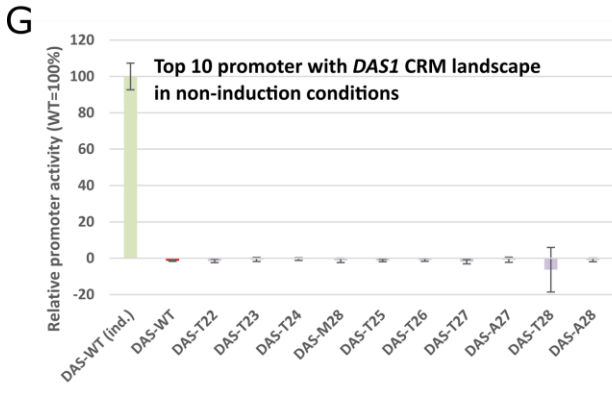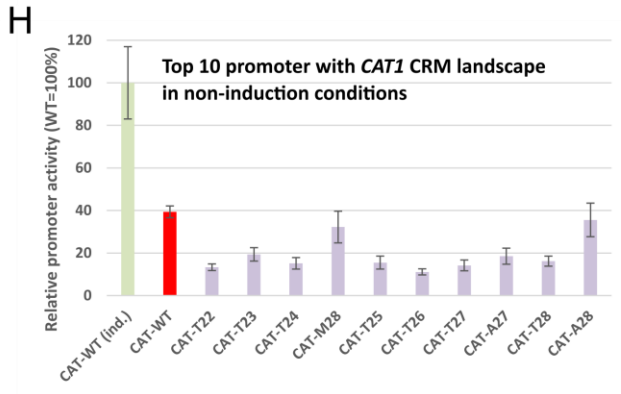

Supplement: sb6b00178_si_001.pdf [file sb6b00178_si_001.pdf]
